# Supplementary material
Source: publisher figshare collection journal article supplement (https://gsajournals.figshare.com/articles/dataset/_/13050818)
Supplement: Supplementary file 1 [file 1]

## Sheet: Table S2 DESeq2_Results_fex10_v
Table S2. A list of differentially expressed genes from comparing the transcriptome of cells cultured in M3 + 10% FEx to the transcriptome of control cells.
ENSEMBL_ID	Geneid	log2FoldChange	pvalue	padj
FBgn0039759	CG9733	8.97034	3.79773e-14	4.94986e-13
FBgn0032629	beat-IIIc	8.57773	6.49159e-13	7.59949e-12
FBgn0283461	Drs	7.61033	0	0
FBgn0041581	AttB	7.54319	4.36413e-87	4.90102e-85
FBgn0037126	CG14567	7.36038	3.36137e-144	8.77409e-142
FBgn0012042	AttA	7.30646	4.74556e-34	1.66664e-32
FBgn0032025	CG7778	7.16302	4.5405e-72	3.98656e-70
FBgn0035452	CG10359	7.07052	1.56533e-205	7.19904e-203
FBgn0060296	pain	7.01637	1.6937e-116	3.14571e-114
FBgn0002576	lz	6.95438	9.89757e-09	7.30816e-08
FBgn0000277	CecA2	6.89938	1.59479e-68	1.29432e-66
FBgn0032422	atilla	6.85992	1.686e-08	1.20288e-07
FBgn0039108	CG10232	6.85772	0	0
FBgn0030847	CG12991	6.83334	5.35032e-52	3.09421e-50
FBgn0030778	CG4678	6.81249	6.20753e-08	4.0951e-07
FBgn0043575	PGRP-SC2	6.66603	7.64831e-08	4.99104e-07
FBgn0025879	Timp	6.66124	3.8409e-54	2.37791e-52
FBgn0003255	rk	6.64086	2.25252e-10	2.06011e-09
FBgn0027584	CG4757	6.57108	6.60756e-08	4.34713e-07
FBgn0263118	tx	6.27146	6.06812e-36	2.21992e-34
FBgn0014865	Mtk	6.23385	1.92821e-36	7.21808e-35
FBgn0037128	CG14572	6.18966	2.33593e-06	1.20386e-05
FBgn0053225	CG33225	6.10033	9.64584e-24	2.37652e-22
FBgn0261258	rgn	6.06715	0	0
FBgn0000276	CecA1	6.02101	1.04604e-307	1.01027e-304
FBgn0004644	hh	6.01641	1.66281e-06	8.72129e-06
FBgn0033250	CG14762	6.01512	1.60757e-06	8.46096e-06
FBgn0002922	nau	6.0014	1.04049e-15	1.52954e-14
FBgn0033136	Tsp42Eo	5.92049	2.665e-08	1.83847e-07
FBgn0015872	Drip	5.90164	9.99964e-47	4.90236e-45
FBgn0032857	CG10947	5.82694	3.72355e-06	1.84232e-05
FBgn0263080	CG43348	5.60677	2.57645e-05	0.000111086
FBgn0283437	PPO1	5.60584	4.87296e-34	1.70518e-32
FBgn0041579	AttC	5.56503	1.8199e-05	8.04422e-05
FBgn0034407	DptB	5.5558	1.09667e-58	7.56549e-57
FBgn0266442	CG45072	5.51653	4.98494e-05	0.000203399
FBgn0036742	CG7497	5.50054	1.23312e-26	3.4027e-25
FBgn0039495	CG5909	5.50017	3.49157e-05	0.000147063
FBgn0040968	CG14933	5.4974	3.4044e-10	3.05007e-09
FBgn0051361	dpr17	5.48788	1.18784e-05	5.41976e-05
FBgn0259989	CG42486	5.46026	4.39213e-10	3.85278e-09
FBgn0000527	e	5.40772	5.33918e-10	4.62059e-09
FBgn0038342	B9d1	5.39919	9.5902e-05	0.000370488
FBgn0052185	edin	5.39849	7.18713e-167	2.23914e-164
FBgn0037167	CG11425	5.3716	0.00012958	0.000489245
FBgn0031762	CG9098	5.36775	1.3422e-09	1.10323e-08
FBgn0038070	CG6753	5.33453	3.53441e-05	0.000148479
FBgn0286929	CG46426	5.30514	1.52393e-09	1.24941e-08
FBgn0030160	CG9691	5.30173	4.4031e-09	3.40201e-08
FBgn0038211	CG9649	5.29702	4.17218e-05	0.000173088
FBgn0042086	Tsp42Eb	5.19193	8.54416e-05	0.000334087
FBgn0031734	CG11147	5.18698	1.93018e-14	2.58912e-13
FBgn0035587	Gdap1	5.17324	7.53673e-09	5.65138e-08
FBgn0038818	Nep4	5.16473	6.43191e-05	0.000256692
FBgn0266756	btsz	5.16084	1.0967e-25	2.91789e-24
FBgn0052181	CG32181	5.126	5.82403e-05	0.000234174
FBgn0266758	Esyt2	5.11154	4.25804e-187	1.52312e-184
FBgn0034655	CG10307	5.08663	0.000177896	0.000649819
FBgn0003429	slo	5.08529	2.24494e-06	1.15945e-05
FBgn0052026	CG32026	5.05488	8.03487e-05	0.000315579
FBgn0259977	Tdc1	5.02954	0.000192094	0.000697459
FBgn0263081	CG43349	5.00746	0.000302018	0.00106069
FBgn0035623	mthl2	4.98733	2.12715e-201	8.93218e-199
FBgn0050160	CG30160	4.96152	0.000539666	0.00179171
FBgn0085407	Pvf3	4.95575	1.18923e-305	1.04415e-302
FBgn0010388	Dro	4.90796	1.03542e-12	1.20194e-11
FBgn0031471	CG3117	4.8975	1.69639e-12	1.93432e-11
FBgn0031902	Wnt6	4.88409	0.000450122	0.00151685
FBgn0051199	CG31199	4.85461	0.000368337	0.00127186
FBgn0032810	CG13077	4.83624	5.25943e-06	2.54232e-05
FBgn0032601	yellow-b	4.83375	6.3489e-44	2.83878e-42
FBgn0052572	CG32572	4.74694	0.00546878	0.014164
FBgn0000636	Fas3	4.73395	5.8784e-31	1.87372e-29
FBgn0034139	CG4927	4.72036	5.2173e-131	1.0721e-128
FBgn0037956	CG6959	4.71464	4.99412e-25	1.2828e-23
FBgn0000278	CecB	4.68991	1.69795e-38	6.77638e-37
FBgn0039667	FipoQ	4.67734	0.00288075	0.00799827
FBgn0004858	elB	4.66582	3.19377e-09	2.5098e-08
FBgn0033649	pyr	4.66576	1.8349e-48	9.37643e-47
FBgn0050203	CG30203	4.54928	0.00234301	0.00665552
FBgn0032798	CG10132	4.52173	1.64214e-117	3.10976e-115
FBgn0026438	Eaat2	4.51242	0.00314375	0.00865023
FBgn0003886	alphaTub85E	4.50692	1.52704e-18	2.767e-17
FBgn0036627	Gagr	4.50348	0.00186385	0.00544497
FBgn0031327	CG5397	4.48025	1.26557e-52	7.453e-51
FBgn0030051	spirit	4.47102	0.000642334	0.00209018
FBgn0030340	CG15740	4.43993	1.19694e-72	1.07038e-70
FBgn0039099	GILT2	4.41961	8.86312e-19	1.63359e-17
FBgn0038282	dpr9	4.41148	0.00212581	0.00611227
FBgn0035711	CG8519	4.40291	5.3229e-05	0.000215833
FBgn0000427	2020-12-01	4.39904	0.00633171	0.0161095
FBgn0032772	CG17350	4.3952	2.23801e-08	1.5595e-07
FBgn0033321	CG8738	4.38324	0.00365714	0.00988758
FBgn0000179	bi	4.35917	8.40818e-07	4.62186e-06
FBgn0050377	CG30377	4.35873	1.02676e-33	3.54159e-32
FBgn0036094	CG14153	4.34818	0.0010263	0.00318508
FBgn0036479	CG13458	4.33864	1.62554e-06	8.55089e-06
FBgn0046874	Pif1B	4.33543	2.97442e-41	1.2655e-39
FBgn0005771	noc	4.29382	4.50677e-06	2.20052e-05
FBgn0042106	CG18754	4.29349	8.61524e-14	1.08766e-12
FBgn0038071	Dtg	4.29067	4.09971e-239	2.47469e-236
FBgn0261015	Pif1A	4.2875	2.341e-41	1.00486e-39
FBgn0002930	nec	4.27015	0.00476055	0.0124803
FBgn0012037	Ance	4.26222	2.90129e-18	5.11327e-17
FBgn0039396	CCAP-R	4.25753	0.00158952	0.00471922
FBgn0032484	kek4	4.22845	0.000182259	0.00066425
FBgn0038088	CG10126	4.21143	0	0
FBgn0029950	CG9657	4.19684	0.00236433	0.00670623
FBgn0038530	AttD	4.19521	4.38158e-201	1.76322e-198
FBgn0024315	Picot	4.16919	5.09299e-21	1.07164e-19
FBgn0036659	CG9701	4.12813	0.0092049	0.0225237
FBgn0036287	CG10663	4.12308	3.43709e-17	5.57906e-16
FBgn0036877	CG9452	4.11106	4.6726e-13	5.54397e-12
FBgn0030846	CG12992	4.11061	0.000265275	0.00094054
FBgn0051219	CG31219	4.10421	1.75442e-30	5.50136e-29
FBgn0266708	Cep89	4.09763	0.00953693	0.0232009
FBgn0050418	nord	4.08606	0.00403692	0.0107882
FBgn0038531	CG14325	4.08336	0.00640029	0.0162607
FBgn0039844	CG1607	4.07762	2.09293e-55	1.34757e-53
FBgn0031791	AANATL2	4.06631	1.11451e-05	5.09656e-05
FBgn0027843	CAH2	4.06417	3.51335e-10	3.13604e-09
FBgn0039758	CG9737	4.04837	8.81935e-11	8.40013e-10
FBgn0030544	CG13403	4.04254	0.0114419	0.0272047
FBgn0259730	tal-1A	4.03988	0.00197369	0.00572429
FBgn0259731	tal-2A	4.03988	0.00197369	0.00572429
FBgn0259732	tal-3A	4.03988	0.00197369	0.00572429
FBgn0259733	tal-AA	4.03988	0.00197369	0.00572429
FBgn0050460	CG30460	4.03888	6.5305e-93	8.19111e-91
FBgn0030357	Sclp	4.02896	1.46963e-08	1.05844e-07
FBgn0264086	CG43755	4.00885	0.0223418	0.0489512
FBgn0085424	nub	3.98189	0.0035793	0.0097049
FBgn0086265	psd	3.94812	0.0162665	0.0370123
FBgn0085460	CG34431	3.94205	9.47802e-11	9.00972e-10
FBgn0262881	CG43236	3.93926	2.3179e-14	3.08776e-13
FBgn0040250	Ugt304A1	3.92637	0.0149201	0.0343173
FBgn0033397	Cyp4p3	3.89412	2.81062e-15	4.00368e-14
FBgn0036876	CG9451	3.8869	0.00930204	0.0227153
FBgn0085376	CG34347	3.88093	1.31333e-26	3.60346e-25
FBgn0262880	CG43235	3.87549	0.012891	0.0302335
FBgn0050101	Vajk4	3.87152	0.0318119	0.0663871
FBgn0033880	CG6553	3.85356	4.14782e-41	1.757e-39
FBgn0025525	bab2	3.85252	6.39054e-98	8.81713e-96
FBgn0031811	CG13982	3.84989	8.89848e-08	5.74091e-07
FBgn0264975	Nrg	3.84917	5.60353e-258	4.16299e-255
FBgn0259110	mmd	3.84571	0.00745439	0.0186177
FBgn0031472	CG2983	3.83537	0.0208004	0.0460336
FBgn0034005	ItgaPS4	3.82929	1.93249e-139	4.4438e-137
FBgn0259211	grh	3.82349	0.0213662	0.0471561
FBgn0260660	Mp	3.79115	7.75637e-12	8.16914e-11
FBgn0015766	Msr-110	3.78267	0.00663837	0.0168233
FBgn0036440	CG17177	3.77539	0.016654	0.0378012
FBgn0026392	Or33a	3.77416	0.0147261	0.0338952
FBgn0053288	CG33288	3.76918	0.00654058	0.0165972
FBgn0031801	CG9498	3.76792	0.0115381	0.0273931
FBgn0045852	ham	3.76703	2.14888e-21	4.61198e-20
FBgn0052843	Dh31-R	3.75342	0.011624	0.0275698
FBgn0028999	nerfin-1	3.74816	0.0231771	0.0504837
FBgn0037486	CG14605	3.74814	0.0223153	0.0489044
FBgn0033949	Had2	3.7317	0.000791754	0.00252785
FBgn0263980	Stacl	3.71421	1.82009e-16	2.81254e-15
FBgn0004359	T48	3.70342	0	0
FBgn0034725	CG6044	3.69159	2.88684e-08	1.98442e-07
FBgn0035577	CG13708	3.68828	0.0116401	0.0276013
FBgn0264296	CG43774	3.68294	0.0226604	0.0495257
FBgn0032684	Ugt301D1	3.6713	0.0279419	0.0593758
FBgn0026398	Or22a	3.6702	0.0404594	0.0816287
FBgn0053109	CG33109	3.67019	0.00894053	0.0219602
FBgn0027844	CAH1	3.66931	0.00204861	0.0059167
FBgn0033446	CG1648	3.66887	5.57151e-15	7.80982e-14
FBgn0031299	CG4629	3.66432	1.0107e-25	2.69651e-24
FBgn0010313	corto	3.6551	1.09881e-09	9.16435e-09
FBgn0031080	CG12655	3.64108	0.0390281	0.0791877
FBgn0033710	CG17739	3.62846	1.57649e-14	2.12651e-13
FBgn0259923	2020-09-04	3.6126	1.2056e-36	4.56614e-35
FBgn0069973	CG40485	3.6089	2.4838e-05	0.000107379
FBgn0032139	CG13116	3.60875	5.09607e-10	4.43005e-09
FBgn0054034	CG34034	3.60673	5.96239e-47	2.96829e-45
FBgn0031888	Pvf2	3.60369	0	0
FBgn0033447	dila	3.59347	0.0281266	0.0597025
FBgn0003162	Pu	3.58924	2.64074e-34	9.37658e-33
FBgn0038214	CG9616	3.55393	0.0126666	0.0297433
FBgn0035234	CG12003	3.55361	0.0306567	0.0643238
FBgn0034045	CG8249	3.55353	0.0279376	0.0593758
FBgn0035797	CG14837	3.5263	0.0021432	0.00615492
FBgn0031470	CG18557	3.52303	0	0
FBgn0025835	CG17707	3.51796	0.0152221	0.034912
FBgn0041087	wun2	3.51484	6.16755e-124	1.21564e-121
FBgn0053329	Sp212	3.49721	3.60031e-147	9.65883e-145
FBgn0051183	CG31183	3.48369	0.00536723	0.0139196
FBgn0053462	CG33462	3.48357	0.0116552	0.0276235
FBgn0004573	5-HT7	3.4761	0.0050594	0.0131886
FBgn0031058	CG14227	3.46759	1.36311e-22	3.20315e-21
FBgn0260006	drd	3.4664	5.58819e-05	0.000225442
FBgn0261989	CG42807	3.46621	0.00263166	0.00737652
FBgn0035265	PIG-Wb	3.45643	0.07102	0.132463
FBgn0029568	CG11381	3.45497	0.00355983	0.00966024
FBgn0031032	CG14204	3.45283	0.00287041	0.00797538
FBgn0039927	CG11155	3.44666	3.77091e-81	3.83362e-79
FBgn0035049	Mmp1	3.43927	3.35106e-151	9.247e-149
FBgn0037683	CG18473	3.43904	2.12116e-24	5.33494e-23
FBgn0029898	CG14439	3.43012	0.00422029	0.0112285
FBgn0031000	Muc18B	3.38577	0.0225454	0.0493414
FBgn0039789	CG9717	3.38234	1.33379e-28	3.93936e-27
FBgn0284244	l(2)k05911	3.35623	0.0475681	0.0937194
FBgn0039244	CG11069	3.34786	0.0227404	0.0496444
FBgn0037895	CG6723	3.34354	0.0219387	0.0482211
FBgn0036620	CG4842	3.34143	1.89965e-06	9.90115e-06
FBgn0033982	Cyp317a1	3.34136	0.018675	0.0418717
FBgn0031547	Sr-CIV	3.34004	0.000532815	0.00177018
FBgn0037906	PGRP-LB	3.33442	8.692e-19	1.60511e-17
FBgn0037238	CG1090	3.33273	0.00507157	0.0132134
FBgn0000547	ed	3.33225	3.87244e-71	3.33929e-69
FBgn0040364	CG11378	3.32467	4.25305e-71	3.63504e-69
FBgn0264815	Pde1c	3.32028	1.40314e-07	8.75987e-07
FBgn0036715	Cad74A	3.3165	0.0260779	0.0559317
FBgn0051706	CG31706	3.31063	0.0260626	0.0559186
FBgn0262570	CG43110	3.30432	7.11913e-26	1.90462e-24
FBgn0034739	CG3927	3.29718	4.55864e-08	3.05322e-07
FBgn0052351	S-Lap2	3.29215	0.0342464	0.0707643
FBgn0034999	Fatp3	3.28703	3.49349e-31	1.12093e-29
FBgn0031469	CG18558	3.28325	3.12003e-09	2.45584e-08
FBgn0051326	CG31326	3.28186	1.12746e-11	1.16212e-10
FBgn0051116	ClC-a	3.28155	1.34114e-26	3.66934e-25
FBgn0260746	Ect3	3.27662	5.61361e-55	3.56686e-53
FBgn0050104	NT5E-2	3.2683	1.0982e-13	1.38284e-12
FBgn0035539	slow	3.25001	5.76909e-56	3.76472e-54
FBgn0026320	Tom	3.24969	0.0314192	0.0657238
FBgn0040089	meso18E	3.2446	1.21644e-24	3.07549e-23
FBgn0032264	Lip4	3.2344	1.63176e-25	4.31768e-24
FBgn0031412	CG16995	3.23437	0.0298966	0.0629341
FBgn0036654	CG9692	3.23314	0.0614596	0.116869
FBgn0003326	sca	3.22252	0.0362089	0.0741529
FBgn0032129	jp	3.21518	0.0107727	0.0258171
FBgn0051029	CG31029	3.2132	0.0014836	0.00444848
FBgn0040257	Ugt302E1	3.20725	0.0347512	0.0716845
FBgn0052192	CG32192	3.20126	0.00135836	0.00410869
FBgn0028699	Rh50	3.20025	0.108801	0.187677
FBgn0039454	CG14247	3.18082	0.071059	0.132463
FBgn0032897	CG9336	3.18067	0.0130864	0.0306174
FBgn0003132	Pp1-13C	3.18029	5.27824e-10	4.57605e-09
FBgn0033320	CG8586	3.17447	0.0372161	0.0759873
FBgn0038484	CG5246	3.15472	0.0494783	0.0969884
FBgn0051719	RluA-1	3.1483	5.2985e-07	3.01372e-06
FBgn0040992	CG10570	3.13771	0.0130621	0.0305753
FBgn0260228	CG42502	3.13771	0.0130621	0.0305753
FBgn0034709	Swim	3.1304	4.78369e-56	3.14292e-54
FBgn0033065	Cyp6w1	3.12463	0.00129941	0.00395266
FBgn0029507	Tsp42Ed	3.1209	1.3037e-239	8.3941e-237
FBgn0035733	CG8641	3.11122	0.0412584	0.082998
FBgn0001112	Gld	3.10543	0.0427027	0.0854584
FBgn0039326	CG10562	3.10105	0.008807	0.0216819
FBgn0052373	CG32373	3.09112	5.94129e-12	6.33345e-11
FBgn0036552	CG17028	3.08961	0.00871601	0.0215127
FBgn0029508	Tsp42Ea	3.08712	0	0
FBgn0037801	CG3999	3.08605	1.63727e-05	7.28028e-05
FBgn0022355	Tsf1	3.08508	4.43643e-06	2.16947e-05
FBgn0020429	GluRIIB	3.08329	0.0759685	0.139833
FBgn0265413	CG44325	3.08183	7.70358e-166	2.32504e-163
FBgn0035710	SP1173	3.07854	1.58259e-77	1.49849e-75
FBgn0034903	sona	3.07219	0.0688789	0.128984
FBgn0037594	Or85d	3.07067	0.0458088	0.0907718
FBgn0030596	CG12398	3.06855	0.052225	0.101671
FBgn0041623	Or65c	3.06315	0.0534568	0.103568
FBgn0286071	AdamTS-A	3.063	7.91305e-46	3.76474e-44
FBgn0250910	Octbeta3R	3.06239	0.0660921	0.12438
FBgn0034909	CG4797	3.05293	0.00171771	0.00505781
FBgn0260000	CG17570	3.05231	0.0703366	0.131471
FBgn0034723	CG13506	3.04947	1.52087e-15	2.21213e-14
FBgn0032297	CG17124	3.04706	1.488e-47	7.48495e-46
FBgn0032588	CG5968	3.04479	0.0527503	0.102446
FBgn0051163	SKIP	3.0418	1.89636e-21	4.11574e-20
FBgn0085354	CG34325	3.0016	5.92178e-12	6.32661e-11
FBgn0031201	CG12446	2.99609	1.36788e-07	8.55082e-07
FBgn0031169	CG1494	2.99408	6.36882e-22	1.43715e-20
FBgn0025836	RhoGAP1A	2.99209	1.57265e-12	1.79535e-11
FBgn0005613	Sox15	2.98372	8.39033e-06	3.91279e-05
FBgn0032666	CG5758	2.97402	2.27446e-36	8.44875e-35
FBgn0000153	b	2.97347	0.000150795	0.000559929
FBgn0024897	b6	2.97313	1.46508e-05	6.57514e-05
FBgn0002945	nkd	2.95638	1.33907e-22	3.15433e-21
FBgn0051121	CG31121	2.95181	0.0798512	0.145702
FBgn0265576	CG44403	2.94685	0.130292	0.218187
FBgn0038740	CG4562	2.94517	8.19172e-12	8.57158e-11
FBgn0039413	CG14556	2.94127	1.93244e-13	2.3745e-12
FBgn0263988	Dic61B	2.94052	0.0482661	0.0948624
FBgn0000056	Adhr	2.93587	0.00015314	0.000567111
FBgn0000055	Adh	2.93587	0.00015314	0.000567111
FBgn0285963	CG46339	2.93513	1.18765e-222	5.73517e-220
FBgn0028514	CG4793	2.92411	6.13772e-90	7.50356e-88
FBgn0263930	dally	2.92115	3.03952e-97	4.1346e-95
FBgn0051546	CG31546	2.91579	0.0555866	0.107135
FBgn0040299	Myo28B1	2.91407	2.01868e-21	4.36161e-20
FBgn0039023	Nepl14	2.91155	0.0524147	0.101902
FBgn0023179	amon	2.90995	0.0757495	0.13951
FBgn0004240	DptA	2.90092	0.000704357	0.00227286
FBgn0266801	CG45263	2.90012	1.76524e-08	1.25543e-07
FBgn0031756	CG13992	2.89962	0.0211628	0.0467392
FBgn0033644	Tret1-2	2.89799	2.96553e-110	5.11449e-108
FBgn0051038	CG31038	2.89539	5.28756e-61	3.78276e-59
FBgn0031248	CG11912	2.88925	0.097068	0.170589
FBgn0013771	Cyp6a9	2.88006	1.71021e-27	4.87233e-26
FBgn0041181	Tep3	2.87821	0.0719589	0.133753
FBgn0052521	CG32521	2.87533	1.10323e-250	7.61073e-248
FBgn0004512	Mdr49	2.87365	1.20797e-20	2.48225e-19
FBgn0039827	CG1544	2.86769	8.12788e-30	2.49203e-28
FBgn0026403	Ndg	2.86157	0.0247104	0.0534139
FBgn0000395	cv-2	2.8611	9.52371e-223	4.84105e-220
FBgn0036205	CG14131	2.85607	0.0783435	0.143412
FBgn0262508	CG43078	2.85108	6.71393e-07	3.74167e-06
FBgn0033981	Cyp6a21	2.84994	5.55989e-05	0.000224488
FBgn0259146	fid	2.84872	0.0965393	0.169863
FBgn0038897	CG5849	2.84433	2.81325e-06	1.43152e-05
FBgn0051807	CG31807	2.84188	0.00171745	0.00505781
FBgn0032683	kon	2.83736	4.20959e-12	4.56299e-11
FBgn0265631	CG44438	2.83621	0.0903745	0.160979
FBgn0015600	toc	2.82667	4.92064e-81	4.95037e-79
FBgn0037487	thw	2.82499	0.0625007	0.118522
FBgn0032023	CG14274	2.82304	0.0268303	0.0573037
FBgn0266417	ringer	2.82227	8.24197e-19	1.52492e-17
FBgn0265052	St3	2.82002	1.49006e-18	2.71017e-17
FBgn0035171	CG12502	2.81615	0.00126	0.00384246
FBgn0263400	CG43446	2.81437	7.49442e-09	5.62839e-08
FBgn0030615	Cyp4s3	2.81379	0.0006446	0.00209685
FBgn0050148	CG30148	2.79951	0.00588852	0.0151173
FBgn0083974	CG34138	2.79596	0.00585691	0.0150402
FBgn0265726	Nna1	2.79577	1.65319e-28	4.86784e-27
FBgn0036461	Zip71B	2.79382	0.0158623	0.0361914
FBgn0004108	Nrt	2.78789	8.71711e-105	1.3579e-102
FBgn0264503	CG43902	2.77842	0.0990456	0.173294
FBgn0039747	AdoR	2.77303	6.69462e-08	4.4014e-07
FBgn0030298	Or10a	2.76479	0.0880554	0.157693
FBgn0045502	Gr10a	2.76479	0.0880554	0.157693
FBgn0261509	haf	2.75911	0.0781032	0.143054
FBgn0030927	CG15046	2.75728	0.000588545	0.00193405
FBgn0037888	scpr-B	2.75621	0.0972321	0.17074
FBgn0027544	CG2217	2.74407	3.735e-39	1.535e-37
FBgn0261704	CG42740	2.74407	3.735e-39	1.535e-37
FBgn0261555	CG42673	2.74266	2.36626e-06	1.2182e-05
FBgn0000024	Ace	2.73448	4.3819e-14	5.67297e-13
FBgn0003159	CG2841	2.73265	9.87676e-81	9.83399e-79
FBgn0033958	jef	2.73177	1.86707e-29	5.67049e-28
FBgn0005666	bt	2.73143	1.71383e-11	1.72959e-10
FBgn0087007	bbg	2.72688	1.38352e-30	4.38099e-29
FBgn0261529	ms(2)34Fe	2.72597	0.107152	0.185228
FBgn0033326	CG14743	2.71778	0.100537	0.17549
FBgn0030653	CG7860	2.71598	2.86857e-12	3.16625e-11
FBgn0053461	CG33461	2.71505	0.112847	0.193757
FBgn0001250	if	2.71209	1.50863e-61	1.09552e-59
FBgn0037386	CG1208	2.70398	0.000356873	0.00123537
FBgn0259246	brp	2.70152	2.49363e-07	1.50428e-06
FBgn0020294	ko	2.69911	0.0330617	0.0686836
FBgn0035287	CG13937	2.69871	0.0363381	0.0743703
FBgn0028496	CG30116	2.69673	0.0874242	0.156825
FBgn0032773	fon	2.69061	1.65537e-51	9.40442e-50
FBgn0054033	CG34033	2.68909	0.000146265	0.000544785
FBgn0259224	CG42324	2.68839	1.38562e-103	2.02763e-101
FBgn0039155	Kal1	2.68808	7.56656e-96	9.823e-94
FBgn0034162	CG6426	2.68497	0.0396616	0.0802876
FBgn0036153	CG7573	2.68427	1.77102e-05	7.84251e-05
FBgn0013772	Cyp6a8	2.67347	0.000332547	0.00115989
FBgn0036116	CG7888	2.67044	5.8762e-86	6.44913e-84
FBgn0039257	tnc	2.6704	0.0453901	0.0900899
FBgn0038909	CG6569	2.66916	2.75376e-66	2.198e-64
FBgn0283531	Duox	2.66198	4.93119e-06	2.39685e-05
FBgn0035612	frm	2.65944	1.2979e-07	8.15028e-07
FBgn0033134	Tsp42El	2.65868	3.53552e-15	5.01411e-14
FBgn0015522	olf186-M	2.65706	3.5731e-17	5.7901e-16
FBgn0026144	CBP	2.65437	4.29427e-08	2.8922e-07
FBgn0034467	CG15128	2.65098	0.0110954	0.026478
FBgn0031908	CG5177	2.6487	0.0894531	0.159693
FBgn0036419	CG13482	2.64781	1.20309e-05	5.47829e-05
FBgn0034740	nsr	2.64717	0.0512435	0.0999616
FBgn0035413	CG14958	2.6416	0.0541627	0.104746
FBgn0038492	Mur89F	2.63978	0.00273187	0.00762995
FBgn0033834	CG4744	2.62442	0.0661291	0.124409
FBgn0033124	Tsp42Ec	2.61953	0.00212943	0.00612084
FBgn0014859	Hr38	2.61353	0.0972692	0.170774
FBgn0014073	Tie	2.61223	0.0902174	0.16076
FBgn0050035	Tret1-1	2.61066	7.09212e-104	1.07024e-101
FBgn0038653	Octalpha2R	2.60408	0.0820388	0.14899
FBgn0267001	Ten-a	2.60217	0.00203471	0.0058836
FBgn0034145	CG5065	2.60204	1.71755e-09	1.40339e-08
FBgn0042630	Sox21b	2.59883	0.0973667	0.170914
FBgn0052170	CG32170	2.59661	2.65656e-36	9.83027e-35
FBgn0032593	Trpgamma	2.5962	0.0724278	0.134495
FBgn0037153	olf413	2.59183	4.37549e-46	2.10241e-44
FBgn0030836	CG8664	2.59161	0.0998612	0.174437
FBgn0040723	CG5011	2.58958	0.0134862	0.0314081
FBgn0003944	Ubx	2.58512	0.0859968	0.154825
FBgn0040359	CG11380	2.58382	0.110737	0.190607
FBgn0003731	Egfr	2.57954	0.000163486	0.00060059
FBgn0050044	s-cup	2.57747	0.097222	0.17074
FBgn0259682	Jabba	2.57661	0.00147179	0.00442305
FBgn0085412	kmr	2.57559	6.17951e-11	5.96221e-10
FBgn0259175	ome	2.57288	3.38799e-105	5.36413e-103
FBgn0039124	tbrd-1	2.56455	0.0429144	0.0858288
FBgn0262029	d	2.56317	0.0142466	0.0329567
FBgn0033775	Cyp9h1	2.55904	8.28822e-10	7.0033e-09
FBgn0031031	CG14218	2.55463	2.39003e-06	1.22977e-05
FBgn0030592	CG9514	2.55353	0.03995	0.0807866
FBgn0263109	CG43366	2.55285	0.0022322	0.00637451
FBgn0029681	CG15239	2.55084	0.124329	0.210072
FBgn0031294	IA-2	2.54296	0.12344	0.208935
FBgn0032895	twit	2.54244	0.125661	0.211952
FBgn0004795	retn	2.53896	0.142706	0.235277
FBgn0051901	Mur29B	2.53336	0.0101389	0.0244926
FBgn0033654	Sobp	2.52843	0.0056515	0.014563
FBgn0040514	CG17169	2.52641	0.107922	0.186479
FBgn0035582	CG13705	2.52444	0.0615193	0.116959
FBgn0037788	CAH7	2.52296	2.55791e-171	8.23477e-169
FBgn0028482	bdl	2.51708	0.0001004	0.000387093
FBgn0003463	sog	2.51705	4.70584e-07	2.70691e-06
FBgn0033919	CG8547	2.50172	6.77356e-108	1.12792e-105
FBgn0011674	insc	2.50016	2.43515e-35	8.77561e-34
FBgn0020248	stet	2.49352	1.28348e-17	2.1409e-16
FBgn0032774	CG17549	2.48839	1.00051e-14	1.36098e-13
FBgn0032602	ppk17	2.4872	7.76381e-10	6.58322e-09
FBgn0000635	Fas2	2.47143	4.01688e-20	8.02198e-19
FBgn0038180	Cht5	2.46209	0.0564572	0.108662
FBgn0025697	santa-maria	2.45957	0.0226841	0.0495552
FBgn0265272	CG30060	2.45545	0.00952894	0.0231873
FBgn0045980	niki	2.45247	2.3907e-57	1.60343e-55
FBgn0034761	CG4250	2.44416	1.01655e-09	8.52983e-09
FBgn0260971	CG42594	2.43218	0.06836	0.128148
FBgn0034789	PIP5K59B	2.42919	0.00366006	0.00989055
FBgn0051019	CG31019	2.42835	0.142117	0.234646
FBgn0262679	CG43149	2.42658	0.00147237	0.00442305
FBgn0083978	CG17672	2.42499	0.0414003	0.0832314
FBgn0027070	Ugt36E1	2.42438	1.34315e-05	6.0674e-05
FBgn0066101	LpR1	2.42423	4.28861e-10	3.7654e-09
FBgn0032010	CG8086	2.41989	9.82722e-09	7.26177e-08
FBgn0052091	CG32091	2.41714	7.39774e-12	7.82556e-11
FBgn0001987	Gli	2.41137	1.27903e-26	3.51934e-25
FBgn0031800	CG9497	2.40641	0.18753	0.291794
FBgn0038213	CG9624	2.40606	0.108594	0.187387
FBgn0259163	CG42268	2.40301	2.43541e-23	5.89503e-22
FBgn0266431	CG45061	2.39709	0.182543	0.285646
FBgn0030928	CG15044	2.38726	0.00445489	0.0117852
FBgn0036786	skl	2.3851	0.104267	0.180889
FBgn0040271	Sulf1	2.37912	1.30483e-193	4.84696e-191
FBgn0024943	PIP82	2.37557	0.157471	0.254955
FBgn0040508	ACXC	2.37342	0.0805174	0.146724
FBgn0054025	CG34025	2.37313	0.0574311	0.110207
FBgn0030895	CG7135	2.36736	0.028193	0.059791
FBgn0052507	CG32507	2.36683	0.140399	0.232346
FBgn0263655	CG43646	2.35782	0.0026777	0.00749166
FBgn0032613	Nepl9	2.35562	0.188628	0.292935
FBgn0004919	gol	2.35265	2.67496e-42	1.16899e-40
FBgn0034200	Gbp2	2.35021	6.7032e-30	2.08166e-28
FBgn0036862	Gbs-76A	2.34915	1.25374e-34	4.46812e-33
FBgn0029994	Ldsdh1	2.34855	0.162165	0.260944
FBgn0050440	CG30440	2.34819	4.09326e-13	4.88662e-12
FBgn0052055	CG32055	2.34734	0.0794084	0.145059
FBgn0034195	Spn53F	2.34457	0.0809401	0.147383
FBgn0016032	lbm	2.34288	1.41739e-104	2.17288e-102
FBgn0000045	Act79B	2.3413	0.0879312	0.157558
FBgn0040503	CG7763	2.33901	0.000381706	0.00131193
FBgn0033448	hebe	2.33474	1.73116e-20	3.52733e-19
FBgn0027556	CG4928	2.33053	2.99496e-09	2.36705e-08
FBgn0051774	fred	2.33045	0.0768849	0.141224
FBgn0265767	zyd	2.32915	0.0092613	0.0226421
FBgn0033214	CG1941	2.32688	0.0316707	0.0661638
FBgn0000075	amd	2.3239	0.100616	0.175574
FBgn0034396	CG15097	2.318	3.57868e-133	7.85521e-131
FBgn0264442	ab	2.31053	0.0134589	0.0313598
FBgn0266492	SclB	2.31004	1.44092e-21	3.13433e-20
FBgn0032140	CG13117	2.30711	4.90659e-131	1.03017e-128
FBgn0266491	SclA	2.30634	1.29688e-21	2.85313e-20
FBgn0038720	CG6231	2.29776	1.50812e-72	1.33627e-70
FBgn0013469	klu	2.29743	0.00365398	0.00988519
FBgn0011761	dhd	2.29341	0.210537	0.31897
FBgn0034439	CG10062	2.29306	4.21651e-07	2.44436e-06
FBgn0001147	gsb-n	2.29282	0.186984	0.291132
FBgn0063498	GstE2	2.29095	1.22987e-77	1.17604e-75
FBgn0013812	Dhc93AB	2.28971	0.098695	0.172806
FBgn0016123	Alp4	2.28771	0.0143798	0.033217
FBgn0262569	CG43109	2.28616	0.211324	0.31975
FBgn0004893	bowl	2.28431	1.52017e-16	2.37186e-15
FBgn0034662	CG13492	2.28391	0.0243146	0.0526409
FBgn0050438	Ugt50B3	2.27841	6.17771e-82	6.34727e-80
FBgn0030576	CG15890	2.27821	1.09275e-10	1.02963e-09
FBgn0086408	stl	2.26852	0.0154491	0.035374
FBgn0032785	CG10026	2.2638	1.86098e-38	7.3963e-37
FBgn0034229	CG4847	2.26238	0.0236344	0.0512945
FBgn0026439	Eaat1	2.26116	1.44155e-06	7.6497e-06
FBgn0013995	Calx	2.25726	1.46674e-05	6.57648e-05
FBgn0038072	CG6225	2.24137	0.043921	0.0874797
FBgn0038179	CG9312	2.24005	6.55663e-29	1.96049e-27
FBgn0038679	CG6040	2.2374	4.13867e-07	2.40212e-06
FBgn0022800	Cad96Ca	2.23703	1.35325e-23	3.30043e-22
FBgn0033874	CG6347	2.23647	0.00164128	0.00485795
FBgn0261612	CngA	2.23395	0.00542243	0.0140552
FBgn0036410	CG8100	2.23137	0.106462	0.184168
FBgn0036427	CG4613	2.23096	0.00624526	0.0159231
FBgn0041182	Tep2	2.23094	8.78647e-89	1.02241e-86
FBgn0031518	CG3277	2.23056	2.76936e-05	0.00011861
FBgn0259821	CG42402	2.22671	0.000132462	0.00049779
FBgn0032024	CG14273	2.22316	9.47218e-165	2.77219e-162
FBgn0259878	Fs	2.22151	0.000197285	0.000714429
FBgn0003475	spir	2.21826	2.28187e-92	2.82543e-90
FBgn0085387	shakB	2.21731	7.68814e-07	4.25757e-06
FBgn0004242	Syt1	2.21684	0.00441522	0.0116924
FBgn0260004	Snmp1	2.21405	0.119105	0.203057
FBgn0001208	Hn	2.21387	0.0429989	0.0859622
FBgn0260758	CG42556	2.21314	8.47328e-05	0.00033145
FBgn0038042	Scgbeta	2.20742	0.104983	0.181944
FBgn0040350	CG3690	2.19994	0.136424	0.226818
FBgn0263973	jv	2.1998	0.21872	0.328303
FBgn0262562	CG43102	2.19965	6.21511e-14	7.9085e-13
FBgn0015609	CadN	2.19504	0.0374681	0.0763915
FBgn0002842	sa	2.18904	0.191346	0.296442
FBgn0035636	Cralbp	2.18657	1.49578e-08	1.07647e-07
FBgn0024189	sns	2.18653	0.170847	0.271657
FBgn0035557	CG11353	2.1827	0.111491	0.191768
FBgn0034476	Toll-7	2.18041	3.58697e-12	3.91004e-11
FBgn0030575	CG5321	2.17669	0.0116498	0.0276175
FBgn0032219	CG4995	2.1759	0.00018224	0.00066425
FBgn0010389	htl	2.17383	0.181291	0.284423
FBgn0036822	NijB	2.17383	0.0736309	0.136179
FBgn0015576	alpha-Est8	2.17358	7.81108e-06	3.65324e-05
FBgn0033069	eIF3f2	2.16732	9.27621e-05	0.000359798
FBgn0022710	Ac13E	2.16667	4.76193e-27	1.34476e-25
FBgn0037916	CG5342	2.16477	0.0549888	0.106153
FBgn0014396	tim	2.16375	0.0107917	0.0258561
FBgn0011706	rpr	2.16336	7.2314e-106	1.18374e-103
FBgn0027580	PCB	2.16264	9.00155e-74	8.2016e-72
FBgn0051092	LpR2	2.16119	1.04482e-58	7.25963e-57
FBgn0031571	bark	2.16006	2.5505e-06	1.30747e-05
FBgn0085459	CG34430	2.15977	6.63511e-43	2.92611e-41
FBgn0035097	CG13405	2.15526	0.0641272	0.121131
FBgn0039101	CG16710	2.15369	2.29268e-14	3.06262e-13
FBgn0264297	CG43775	2.15062	0.203772	0.311397
FBgn0264298	CG43776	2.15062	0.203772	0.311397
FBgn0264299	CG43777	2.15062	0.203772	0.311397
FBgn0039736	CG7912	2.14996	0.121832	0.206793
FBgn0266084	Fhos	2.14915	3.91638e-102	5.64544e-100
FBgn0039852	nyo	2.14812	0.0344487	0.0711366
FBgn0051956	Pgant4	2.14765	0.129958	0.217716
FBgn0051778	CG31778	2.14656	7.36166e-06	3.4598e-05
FBgn0032900	CG14401	2.14573	0.0116696	0.027644
FBgn0036324	CG12520	2.14022	0.0292525	0.0617667
FBgn0002838	ms(3)K81	2.13701	0.187728	0.291917
FBgn0031869	CG18304	2.13687	0.0285473	0.0604337
FBgn0033443	CG1698	2.13209	0.0436182	0.0869484
FBgn0004580	Cbp53E	2.1313	0.216334	0.325902
FBgn0034733	CG4752	2.12533	9.03823e-36	3.28163e-34
FBgn0051869	CG31869	2.11884	0.122523	0.207638
FBgn0083972	CG34136	2.11675	0.0509394	0.0995091
FBgn0052819	CG32819	2.11435	0.10833	0.186998
FBgn0035146	CG13893	2.11082	7.62814e-96	9.823e-94
FBgn0035815	Snmp2	2.10993	0.196746	0.303057
FBgn0036619	Cpr72Ec	2.1008	0.20126	0.308499
FBgn0030078	CG10970	2.1007	0.00355818	0.00965849
FBgn0035246	CG13928	2.0993	0.000158965	0.000585763
FBgn0039332	alrm	2.09879	0.0718667	0.133633
FBgn0032969	CG2528	2.09519	0.0416195	0.0835851
FBgn0033725	Cpr49Ac	2.09309	0.00480256	0.0125733
FBgn0004511	dy	2.07906	0.00582035	0.0149582
FBgn0039640	CG14516	2.07109	3.77588e-66	2.98913e-64
FBgn0262855	CG43219	2.06952	0.152922	0.24858
FBgn0035708	axed	2.06866	6.34726e-12	6.73646e-11
FBgn0259196	CG42300	2.06677	6.38028e-19	1.1873e-17
FBgn0033724	CG8501	2.06356	5.71489e-11	5.51944e-10
FBgn0260745	mfas	2.06009	4.5307e-29	1.37171e-27
FBgn0036485	FucTA	2.05977	3.26132e-22	7.48168e-21
FBgn0032115	CG4438	2.05775	0.201739	0.309023
FBgn0001145	Gs2	2.05687	5.30419e-26	1.423e-24
FBgn0015519	nAChRalpha3	2.0532	0.00879543	0.0216644
FBgn0029922	CG14431	2.05269	0.0289652	0.0612001
FBgn0039594	snu	2.04997	0.0505835	0.0988866
FBgn0029932	CG4607	2.0497	6.94392e-48	3.52971e-46
FBgn0035273	CG12020	2.04961	0.229042	0.339873
FBgn0028430	He	2.04774	2.32506e-10	2.12445e-09
FBgn0015774	NetB	2.04751	5.0791e-10	4.41927e-09
FBgn0003996	w	2.04477	0.128996	0.216555
FBgn0087012	5-HT2A	2.04425	0.0372226	0.0759873
FBgn0033524	Cyp49a1	2.03957	0.164722	0.263654
FBgn0003388	shd	2.03889	0.00014978	0.000556589
FBgn0030317	CG1561	2.03209	0.193309	0.298859
FBgn0264494	CG17646	2.02953	7.81868e-12	8.21685e-11
FBgn0031737	obst-E	2.02783	0.0729348	0.13528
FBgn0037076	ebd2	2.0268	3.65364e-23	8.77782e-22
FBgn0010395	Itgbn	2.02573	2.68777e-53	1.62241e-51
FBgn0033132	Tsp42Ej	2.02045	4.04219e-06	1.99079e-05
FBgn0039010	CG4907	2.01199	0.072311	0.134342
FBgn0053542	upd3	2.00802	1.33847e-37	5.21249e-36
FBgn0031389	CG4259	2.00796	2.14191e-15	3.07836e-14
FBgn0003390	shf	2.00594	5.26993e-08	3.5053e-07
FBgn0267337	rn	2.00435	0.0731251	0.135457
FBgn0001075	ft	2.00206	0.0611842	0.116368
FBgn0036560	CG5895	2.00062	6.78356e-102	9.63464e-100
FBgn0031530	Pgant2	2.0003	8.43551e-18	1.4268e-16
FBgn0013949	Elal	1.99896	2.90186e-07	1.72724e-06
FBgn0034741	CG4269	1.99286	6.52577e-07	3.65579e-06
FBgn0028704	Nckx30C	1.99117	4.16768e-05	0.000172976
FBgn0039500	CG5984	1.99083	0.28855	0.406159
FBgn0053080	CG33080	1.9891	1.08419e-14	1.47273e-13
FBgn0052037	CG32037	1.98752	0.190666	0.295484
FBgn0003028	ovo	1.98639	0.0028948	0.0080316
FBgn0051858	t-cup	1.98495	0.0913306	0.162358
FBgn0034251	ND-51L1	1.97778	0.0281158	0.0596927
FBgn0259736	CG42390	1.97658	4.94611e-128	9.95198e-126
FBgn0039459	IntS12	1.97361	4.02654e-26	1.08931e-24
FBgn0029877	CG17717	1.97314	0.185804	0.289574
FBgn0086906	sls	1.97265	1.24954e-13	1.56322e-12
FBgn0030432	CG4404	1.97194	8.35496e-09	6.25037e-08
FBgn0052512	CG32512	1.96807	3.39273e-60	2.37442e-58
FBgn0029679	CG2901	1.96515	0.215021	0.324228
FBgn0052677	X11Lbeta	1.96017	5.76897e-07	3.25638e-06
FBgn0026314	Ugt35B1	1.9589	0.206852	0.314859
FBgn0037408	NPFR	1.95851	0.225912	0.336084
FBgn0033830	CG10814	1.9578	0.0514203	0.100266
FBgn0064237	Idgf5	1.9561	7.07037e-83	7.42235e-81
FBgn0028572	qtc	1.9509	6.8257e-06	3.22834e-05
FBgn0053099	CG33099	1.94815	4.16569e-05	0.000172968
FBgn0034724	babos	1.94619	6.80602e-30	2.10681e-28
FBgn0002789	Mp20	1.94035	0.171727	0.272831
FBgn0027563	CG9631	1.94034	1.54644e-23	3.75264e-22
FBgn0036612	CG4998	1.93603	0.0164631	0.0374151
FBgn0035915	S-Lap1	1.93045	0.206687	0.314707
FBgn0034706	CG11275	1.9292	1.85537e-07	1.13484e-06
FBgn0032967	CG1428	1.92464	0.0998122	0.174414
FBgn0051191	CG31191	1.92131	0.000207668	0.00074866
FBgn0261928	CG42795	1.92111	0.0895658	0.159864
FBgn0031414	eys	1.92066	0.0214006	0.0471887
FBgn0264489	CG43897	1.92024	0.000340325	0.0011836
FBgn0051769	CG31769	1.91635	0.00845863	0.0209524
FBgn0041184	Socs36E	1.90579	3.8068e-162	1.08136e-159
FBgn0010397	LamC	1.9034	1.06254e-32	3.55088e-31
FBgn0039833	CG15564	1.90332	0.214639	0.323802
FBgn0265991	Zasp52	1.90252	6.1803e-88	7.02227e-86
FBgn0259244	CG42342	1.89615	1.56661e-13	1.94227e-12
FBgn0063649	CG6006	1.89129	6.93327e-52	3.98581e-50
FBgn0039323	CG10559	1.89072	0.0850636	0.153502
FBgn0037254	CG14651	1.89028	0.234405	0.346213
FBgn0053239	Ste:CG33239	1.89017	0.180237	0.283184
FBgn0259734	Nost	1.88667	8.89844e-08	5.74091e-07
FBgn0036996	mag	1.88619	0.105141	0.182112
FBgn0028940	Cyp28a5	1.88323	0.126511	0.213162
FBgn0024150	Ac78C	1.88186	2.6276e-15	3.75405e-14
FBgn0011286	RyR	1.87736	0.000907904	0.00285434
FBgn0262476	CG43066	1.87653	0.0359075	0.0736139
FBgn0005677	dac	1.87643	0.181763	0.284933
FBgn0085427	CG34398	1.87614	2.07092e-49	1.06957e-47
FBgn0268063	ltl	1.87331	0.0101629	0.024544
FBgn0035480	CG14984	1.87299	0.000399401	0.00136305
FBgn0259227	CG42327	1.87237	2.93937e-20	5.91425e-19
FBgn0038156	side-IV	1.8581	0.180118	0.283043
FBgn0053826	His2A:CG33826	1.85536	0.240018	0.352026
FBgn0043791	phu	1.85507	1.48187e-11	1.50494e-10
FBgn0039872	salt	1.85256	0.206048	0.31408
FBgn0038436	Gyc89Db	1.85107	1.2627e-16	1.97652e-15
FBgn0033497	CG12912	1.84528	6.57453e-05	0.000261951
FBgn0033980	Cyp6a20	1.84297	1.10446e-65	8.60233e-64
FBgn0051014	PH4alphaSG1	1.83459	0.241396	0.353726
FBgn0000448	Hr3	1.8321	4.27794e-07	2.47551e-06
FBgn0020445	E23	1.83181	9.09042e-10	7.66102e-09
FBgn0035563	CG13716	1.83095	0.181552	0.284786
FBgn0051721	Trim9	1.83034	0.120632	0.205188
FBgn0284237	CG46321	1.82227	4.91773e-07	2.81633e-06
FBgn0264562	Hr4	1.82189	2.66092e-07	1.59722e-06
FBgn0031196	Cluap1	1.81427	0.013152	0.0307486
FBgn0031307	MFS3	1.81339	1.51549e-14	2.04995e-13
FBgn0030065	CG12075	1.80833	2.55684e-47	1.27948e-45
FBgn0039821	CG15556	1.80807	0.129064	0.216602
FBgn0052811	CG32811	1.80742	7.71508e-05	0.000303884
FBgn0027654	jdp	1.80429	0.0189489	0.0424024
FBgn0041604	dlp	1.80056	5.71133e-39	2.32743e-37
FBgn0034053	Cyp4aa1	1.80045	0.0191632	0.0427432
FBgn0032144	CG17633	1.80009	0.00231963	0.00659494
FBgn0041621	Or82a	1.79829	0.0296331	0.0624748
FBgn0003380	Sh	1.79794	0.0307119	0.0644117
FBgn0029830	Grip	1.79785	3.39207e-09	2.65914e-08
FBgn0085400	side-V	1.79296	0.250276	0.36362
FBgn0030326	CG2444	1.79272	0.0621833	0.118019
FBgn0031473	CG3104	1.79182	0.122493	0.207624
FBgn0035481	CG12605	1.78939	0.156777	0.253967
FBgn0030887	CG6867	1.78458	0.144641	0.238142
FBgn0052679	CG32679	1.77804	0.0212678	0.0469604
FBgn0263706	CG43658	1.77731	8.51015e-15	1.16253e-13
FBgn0051816	CG31816	1.7725	0.0270526	0.0576892
FBgn0032681	CG10283	1.77077	0.00371651	0.0100291
FBgn0034887	St1	1.76999	1.17942e-10	1.10591e-09
FBgn0263776	CG43693	1.75953	0.0218425	0.0480427
FBgn0264750	CG44008	1.75925	0.000580349	0.00191297
FBgn0085408	Shrm	1.75825	8.53726e-06	3.97555e-05
FBgn0011296	l(2)efl	1.75635	2.60478e-05	0.000112207
FBgn0041156	exex	1.75573	0.181747	0.284933
FBgn0050090	CG30090	1.75494	0.043089	0.0861245
FBgn0032945	CG8665	1.74884	0.00839967	0.0208331
FBgn0038165	Task6	1.74818	0.332887	0.453204
FBgn0086368	tw	1.74782	0.20987	0.318249
FBgn0064227	Rdh	1.74489	0.164702	0.263654
FBgn0035426	CG12078	1.74311	0.251871	0.365416
FBgn0030985	Obp18a	1.74253	2.60264e-37	1.00145e-35
FBgn0010041	GstD5	1.74249	5.56555e-22	1.26179e-20
FBgn0052302	CG32302	1.73261	0.263999	0.378856
FBgn0262160	CG9932	1.72875	1.56273e-140	3.68118e-138
FBgn0037296	Prosbeta2R2	1.72786	0.0817196	0.148522
FBgn0034737	CG11362	1.72424	7.23933e-09	5.44953e-08
FBgn0026255	clumsy	1.72395	0.0176689	0.0398893
FBgn0027570	Nep2	1.7212	0.0543724	0.105089
FBgn0038565	CG7794	1.72059	0.162382	0.261139
FBgn0031702	fusl	1.71936	0.145796	0.239553
FBgn0024361	Tsp2A	1.71876	4.60591e-07	2.65734e-06
FBgn0035501	CG1299	1.71514	0.0050723	0.0132134
FBgn0040505	Alk	1.71467	0.0954932	0.168483
FBgn0032434	CG5421	1.71192	0.113221	0.194226
FBgn0027585	CG8740	1.70993	0.0823055	0.149396
FBgn0031292	CG15824	1.70886	0.233637	0.345236
FBgn0021767	org-1	1.70806	0.246623	0.359688
FBgn0030662	CG9220	1.7061	5.85787e-42	2.54844e-40
FBgn0050502	fa2h	1.70528	3.36424e-05	0.000142571
FBgn0030998	CG14195	1.70137	0.279025	0.396123
FBgn0052820	CG32820	1.70102	0.0970666	0.170589
FBgn0263111	cac	1.70006	0.00631981	0.0160843
FBgn0034335	GstE1	1.69541	0.0227384	0.0496444
FBgn0264894	CG44085	1.69175	2.22316e-46	1.07896e-44
FBgn0053257	CG33257	1.67938	0.0863434	0.155318
FBgn0261565	Lmpt	1.67903	6.55524e-85	7.03451e-83
FBgn0262867	Ptr	1.6764	0.00823968	0.0204836
FBgn0005626	ple	1.67525	0.0177058	0.0399632
FBgn0264490	Eip93F	1.67442	4.88358e-27	1.37509e-25
FBgn0004910	Eip63F-1	1.67048	0.00242361	0.00685619
FBgn0034143	CG8303	1.6694	0.22588	0.336084
FBgn0264574	Glut1	1.66888	0.000372489	0.0012839
FBgn0031168	CG1722	1.66792	0.182489	0.285607
FBgn0034363	CG5327	1.66742	0.285525	0.402863
FBgn0263038	CG43333	1.66663	0.038468	0.0781498
FBgn0034438	CG9416	1.6659	1.52419e-16	2.37429e-15
FBgn0262808	CG43179	1.66588	0.0869152	0.156027
FBgn0035308	CG15822	1.66474	0.265844	0.381334
FBgn0003218	rdgB	1.66384	7.96166e-32	2.59776e-30
FBgn0264087	Slob	1.66229	0.0805726	0.146797
FBgn0039536	unc80	1.65632	0.389167	0.51151
FBgn0000047	Act88F	1.65515	0.0815593	0.148259
FBgn0263289	scrib	1.65338	1.6465e-136	3.69811e-134
FBgn0262983	CG43291	1.64977	0.000628899	0.00205338
FBgn0062517	CG16984	1.6485	0.145972	0.239768
FBgn0010482	l(2)01289	1.64832	7.06331e-15	9.78751e-14
FBgn0010238	Lac	1.64797	1.30741e-105	2.10449e-103
FBgn0050052	Obp49a	1.64788	0.119763	0.203999
FBgn0039467	CG14253	1.64423	8.60211e-58	5.85065e-56
FBgn0000723	FER	1.64293	1.24196e-142	3.07561e-140
FBgn0263994	CG43737	1.63682	0.191961	0.297257
FBgn0011589	Elk	1.63514	0.100621	0.175574
FBgn0003975	vg	1.63231	0.179873	0.282749
FBgn0259822	Ca-beta	1.62797	0.242796	0.355459
FBgn0037050	ICA69	1.62698	0.174317	0.275992
FBgn0262475	bru2	1.62664	0.00860855	0.0212692
FBgn0259195	CG42299	1.62556	3.68689e-07	2.15024e-06
FBgn0034647	pirk	1.6251	3.95845e-88	4.55127e-86
FBgn0266099	CG44836	1.62294	0.14856	0.243185
FBgn0035855	CG7366	1.61977	0.1744	0.276078
FBgn0039644	rdog	1.61815	9.1862e-71	7.78248e-69
FBgn0067317	Cby	1.61534	0.00384421	0.0103374
FBgn0035144	Kah	1.61276	3.20813e-10	2.88762e-09
FBgn0037230	Nepl11	1.6119	0.0590296	0.112803
FBgn0003423	slgA	1.61098	2.57489e-89	3.07016e-87
FBgn0262595	CheA56a	1.61006	0.147414	0.241583
FBgn0030617	CG9095	1.60849	0.13127	0.219443
FBgn0003513	ss	1.60597	0.215939	0.325459
FBgn0085397	Fili	1.60441	0.0913271	0.162358
FBgn0026174	SkpD	1.60367	0.199217	0.306233
FBgn0259229	CG42329	1.60021	0.195682	0.301749
FBgn0038890	CG7956	1.5965	2.35932e-51	1.32479e-49
FBgn0040827	CG13315	1.59567	1.18799e-05	5.41976e-05
FBgn0015037	Cyp4p1	1.59393	0.000341335	0.00118669
FBgn0029831	CG5966	1.58857	0.0723348	0.134348
FBgn0032851	CG13970	1.58798	0.20101	0.308249
FBgn0284229	CG46313	1.58676	2.62828e-65	2.03071e-63
FBgn0030798	CG13003	1.58644	0.248301	0.361636
FBgn0038012	CG10013	1.58624	0.0336169	0.0696572
FBgn0035619	Alp10	1.58597	0.344869	0.466577
FBgn0259714	DIP-epsilon	1.58535	0.00771804	0.0192413
FBgn0024321	NK7.1	1.5754	3.11446e-44	1.40558e-42
FBgn0262484	CG43074	1.56896	0.00120105	0.00368012
FBgn0016920	nompC	1.56802	0.0868116	0.155899
FBgn0038460	CG18622	1.56689	0.000384469	0.00131861
FBgn0000250	cact	1.56251	7.28625e-111	1.27947e-108
FBgn0037989	ATP8B	1.56063	1.11473e-38	4.46726e-37
FBgn0016650	Lgr1	1.56032	0.139918	0.231709
FBgn0259145	CG42260	1.559	0.0185629	0.0416834
FBgn0000463	Dl	1.55846	0.346631	0.468278
FBgn0262982	CG43290	1.55751	0.219831	0.32945
FBgn0261560	Thor	1.55548	1.88804e-54	1.17643e-52
FBgn0039178	CG6356	1.55468	0.00336803	0.00920183
FBgn0004516	Gad1	1.55326	0.0117238	0.0277181
FBgn0036415	CG7768	1.55105	0.000908802	0.00285624
FBgn0035398	Cht7	1.54696	0.111543	0.191825
FBgn0002732	E(spl)malpha-BFM	1.5462	0.0437218	0.0871368
FBgn0033887	St4	1.54294	0.207059	0.314988
FBgn0034406	Jheh3	1.54239	0.000152813	0.000566336
FBgn0086355	Tpi	1.54133	1.00441e-23	2.46834e-22
FBgn0035694	CG13299	1.54096	0.0382505	0.0778062
FBgn0039043	CG17121	1.54096	0.228222	0.338998
FBgn0000279	CecC	1.53996	3.43676e-10	3.0762e-09
FBgn0250907	Cht10	1.53509	1.88634e-35	6.82332e-34
FBgn0042627	FASN2	1.53075	0.0336864	0.0697713
FBgn0011582	Dop1R1	1.52803	0.0433454	0.0864937
FBgn0035776	CG8564	1.52753	2.06846e-20	4.19688e-19
FBgn0262057	Spn77Ba	1.52713	1.18133e-23	2.89576e-22
FBgn0040842	CG15212	1.52517	0.323753	0.443834
FBgn0011722	Tig	1.52392	1.30598e-54	8.19036e-53
FBgn0030300	Sk1	1.52288	4.96137e-11	4.83033e-10
FBgn0036551	CG17029	1.52197	1.4371e-09	1.18023e-08
FBgn0037553	CG18249	1.52108	2.09152e-25	5.48911e-24
FBgn0261085	Syt12	1.51811	0.204109	0.311764
FBgn0053970	CG33970	1.51595	1.60747e-06	8.46096e-06
FBgn0038416	CG17930	1.51512	0.0054145	0.0140385
FBgn0000658	fj	1.50531	0.176725	0.2788
FBgn0266757	mfr	1.50395	0.298861	0.417291
FBgn0030837	CG8661	1.50277	0.112347	0.193
FBgn0265089	eIF4E3	1.50237	0.292293	0.410314
FBgn0287209	Gfat1	1.50125	0.0606664	0.115542
FBgn0264695	Mhc	1.50046	0.162862	0.261674
FBgn0030187	Ipod	1.4982	0.0886247	0.158419
FBgn0002962	nos	1.49766	0.0231085	0.0503569
FBgn0004507	GlyP	1.49684	6.5363e-36	2.38217e-34
FBgn0030661	Alp11	1.4962	0.0608421	0.115809
FBgn0030417	CG15725	1.49614	0.299221	0.417672
FBgn0034606	ASPP	1.4957	0.296804	0.41514
FBgn0025641	DAAM	1.49527	3.89306e-53	2.33535e-51
FBgn0004870	bab1	1.49239	4.66751e-08	3.12396e-07
FBgn0085425	CG34396	1.49116	0.152266	0.247783
FBgn0051755	SoYb	1.4901	7.71891e-18	1.3148e-16
FBgn0261631	CG42714	1.48921	0.00745392	0.0186177
FBgn0037996	CG4830	1.48729	0.203324	0.311008
FBgn0262481	CG43071	1.48666	0.09019	0.160741
FBgn0020377	Sr-CII	1.48513	0.34524	0.466928
FBgn0025686	Amnionless	1.48408	0.335147	0.455895
FBgn0040496	CG17104	1.48344	0.210941	0.319371
FBgn0025642	CG32812	1.47906	1.96284e-16	3.02169e-15
FBgn0287185	nvd	1.47859	0.170798	0.271623
FBgn0262624	Tmhs	1.47747	0.184453	0.287841
FBgn0030817	CG4991	1.47744	0.0183357	0.04125
FBgn0030613	Rab3-GEF	1.47426	0.000160302	0.000590013
FBgn0036665	CG13024	1.47328	0.175792	0.277691
FBgn0016976	stnA	1.47308	8.11199e-51	4.40144e-49
FBgn0016975	stnB	1.47308	8.11199e-51	4.40144e-49
FBgn0003285	rst	1.47223	0.316791	0.436753
FBgn0260964	Vmat	1.47198	0.234458	0.346238
FBgn0085409	smal	1.47059	0.167247	0.26703
FBgn0035914	CG6282	1.47011	0.378613	0.50146
FBgn0259167	CG42272	1.46692	0.225156	0.335322
FBgn0032218	CG5381	1.46648	1.14907e-21	2.53373e-20
FBgn0032048	Dh31	1.46473	0.31698	0.436842
FBgn0039491	CG6059	1.46459	0.328589	0.449119
FBgn0039510	CG3339	1.4634	0.0809651	0.147401
FBgn0032414	CG17211	1.46206	0.251219	0.364578
FBgn0031735	CG11029	1.45842	0.210423	0.318887
FBgn0263397	Ih	1.45677	6.31609e-34	2.20219e-32
FBgn0052311	zormin	1.45671	8.49155e-10	7.16256e-09
FBgn0040351	CG11638	1.45667	1.03184e-56	6.87276e-55
FBgn0264308	CG43778	1.45639	0.0736026	0.136153
FBgn0039290	CG13654	1.45359	8.67461e-48	4.38635e-46
FBgn0031920	CG6441	1.45183	0.343937	0.465818
FBgn0039415	CG6142	1.45153	0.00110397	0.00340644
FBgn0002543	robo2	1.4481	2.92085e-78	2.82096e-76
FBgn0034142	CG8306	1.44796	5.28769e-89	6.22787e-87
FBgn0052006	CG32006	1.44735	0.331838	0.452221
FBgn0036984	CG13248	1.4468	0.00230118	0.00655018
FBgn0085285	CG34256	1.44653	0.140871	0.232927
FBgn0035468	Gr63a	1.44572	0.137515	0.228238
FBgn0266346	CngB	1.44534	0.000154055	0.000570279
FBgn0085384	CG34355	1.44534	1.75398e-10	1.63198e-09
FBgn0003301	rut	1.4445	2.13107e-69	1.75913e-67
FBgn0032085	CG9555	1.44302	0.361317	0.483994
FBgn0035697	CG10163	1.44293	0.256698	0.370526
FBgn0032483	CG15482	1.44275	0.0518734	0.101088
FBgn0283440	solo	1.44251	0.217668	0.327248
FBgn0037140	SLC22A	1.44187	0.296217	0.414498
FBgn0263041	CG43336	1.44184	0.321787	0.44198
FBgn0039611	Nepl18	1.44183	0.178625	0.281337
FBgn0030230	Rph	1.44117	7.10457e-06	3.34875e-05
FBgn0033268	Obp44a	1.43594	0.237038	0.348874
FBgn0030932	Ggt-1	1.4339	0.0215712	0.0474891
FBgn0264907	CG44098	1.43328	0.277138	0.393897
FBgn0035267	CG13921	1.43284	0.00176919	0.00519357
FBgn0031887	Ugt307A1	1.4321	0.239612	0.351793
FBgn0085479	CG34450	1.4255	0.0715912	0.133197
FBgn0033115	Spn42De	1.42364	5.52657e-11	5.35362e-10
FBgn0039916	Ekar	1.42041	5.68954e-12	6.08523e-11
FBgn0036923	CG17732	1.42006	0.163597	0.262552
FBgn0035578	CG13707	1.41927	0.00558249	0.014416
FBgn0029003	mab-21	1.41555	0.414364	0.536238
FBgn0002564	Lsp1gamma	1.4154	0.306361	0.425303
FBgn0053552	CG33552	1.41459	0.306907	0.425755
FBgn0052814	CG32814	1.40807	3.20001e-14	4.19915e-13
FBgn0029837	Tsp5D	1.408	0.193609	0.29918
FBgn0040028	CG17450	1.40667	0.332621	0.452904
FBgn0038105	yellow-f2	1.40106	2.14649e-11	2.15946e-10
FBgn0038452	CG14905	1.40046	0.214981	0.324228
FBgn0053547	Rim	1.4003	0.0459139	0.0909614
FBgn0004552	Akh	1.40023	0.109187	0.188242
FBgn0261714	Cpn	1.40002	0.125417	0.211666
FBgn0037016	CG13252	1.39566	1.2668e-09	1.0466e-08
FBgn0085399	CG34370	1.39453	0.267592	0.383329
FBgn0264089	sli	1.39451	9.0274e-45	4.23236e-43
FBgn0053857	His3:CG33857	1.39435	0.0594067	0.113412
FBgn0264699	CG43968	1.39428	6.06493e-05	0.000243252
FBgn0039420	CG6154	1.3925	0.0470297	0.092886
FBgn0027376	rha	1.39208	0.253092	0.366704
FBgn0037387	CG1213	1.39064	0.186599	0.29058
FBgn0030748	Traf-like	1.38864	2.2666e-05	9.85627e-05
FBgn0034974	CG16786	1.38661	0.294088	0.412236
FBgn0062978	CG31808	1.38589	0.00835086	0.0207333
FBgn0004509	Fur1	1.3851	4.38156e-58	3.00121e-56
FBgn0034638	CG10433	1.38467	6.07355e-22	1.37373e-20
FBgn0020647	KrT95D	1.38462	1.75428e-182	6.05101e-180
FBgn0031957	TwdlE	1.38111	0.447439	0.568563
FBgn0000320	eya	1.37789	0.411652	0.533441
FBgn0011653	mas	1.37599	0.0942955	0.166827
FBgn0036993	CG5910	1.37568	0.0287642	0.0608155
FBgn0033130	Tsp42Ei	1.37501	0.250406	0.363672
FBgn0030040	CG15347	1.37437	9.48184e-22	2.11004e-20
FBgn0030159	CG9689	1.37382	0.203988	0.311629
FBgn0030360	CG1806	1.37286	0.303348	0.422262
FBgn0036575	CG5157	1.37159	2.50214e-10	2.26695e-09
FBgn0051720	mthl15	1.36996	0.110707	0.190589
FBgn0262509	nrm	1.36609	0.000443316	0.00149757
FBgn0034194	CG15611	1.36538	3.12956e-13	3.77816e-12
FBgn0051547	NKCC	1.35815	0.128577	0.216002
FBgn0034221	CG10764	1.35536	1.78194e-16	2.75801e-15
FBgn0029993	CG1571	1.35476	0.402084	0.524703
FBgn0034861	CG9815	1.35419	0.171966	0.273076
FBgn0047334	BG642312	1.35285	0.000120581	0.000458311
FBgn0031857	LUBEL	1.35132	0.147234	0.241382
FBgn0040099	lectin-28C	1.35094	7.14017e-05	0.000282738
FBgn0032147	IP3K1	1.35086	6.27569e-35	2.25318e-33
FBgn0013733	shot	1.34839	5.80889e-31	1.85769e-29
FBgn0001258	Ldh	1.3474	4.25739e-06	2.09145e-05
FBgn0039704	neo	1.3471	0.26785	0.383528
FBgn0036859	CG14085	1.34361	0.249776	0.363031
FBgn0250871	pot	1.34009	0.103066	0.179217
FBgn0016797	fz2	1.33898	2.50207e-51	1.39682e-49
FBgn0031645	CG3036	1.33888	2.70425e-19	5.16158e-18
FBgn0038934	Gld2	1.33806	0.0265171	0.056735
FBgn0000422	Ddc	1.33695	0.0928019	0.164425
FBgn0022700	Cht4	1.33429	0.303383	0.422262
FBgn0033860	S-Lap5	1.33181	0.274122	0.390597
FBgn0039343	CG5111	1.33148	5.542e-22	1.2594e-20
FBgn0264979	CG4267	1.33084	0.000424566	0.00144078
FBgn0250862	CG42237	1.33057	0.303354	0.422262
FBgn0030052	CG12065	1.33004	4.72001e-55	3.01893e-53
FBgn0000489	Pka-C3	1.32994	0.0314848	0.0658468
FBgn0031081	Nep3	1.3272	0.211911	0.320338
FBgn0264341	CG43797	1.32688	0.220748	0.330524
FBgn0265180	CG44245	1.32273	0.00147821	0.00443509
FBgn0267796	Tmc	1.32261	0.428866	0.550358
FBgn0265416	Neto	1.32231	0.138404	0.229556
FBgn0036319	Ent3	1.31867	0.0286659	0.0606208
FBgn0034049	bdg	1.31553	5.07397e-61	3.65705e-59
FBgn0265274	Inx3	1.3123	3.53415e-05	0.000148479
FBgn0000017	Abl	1.30903	3.41257e-82	3.54393e-80
FBgn0016930	Dyrk2	1.30582	1.71661e-44	7.85736e-43
FBgn0043865	SA-2	1.3049	0.0710598	0.132463
FBgn0034275	CG5002	1.3039	0.2101	0.318448
FBgn0037217	CG14636	1.30247	0.00828393	0.020583
FBgn0030319	CG2533	1.30177	0.0333454	0.0691836
FBgn0027494	RpS10a	1.29921	0.205646	0.313666
FBgn0038744	CG4733	1.29807	1.12197e-08	8.20911e-08
FBgn0020304	drongo	1.29764	9.95599e-122	1.9231e-119
FBgn0266709	Zmynd10	1.29723	0.0196503	0.0436785
FBgn0030904	upd2	1.29677	2.40752e-06	1.23812e-05
FBgn0035505	Teh2	1.29442	0.0948628	0.167665
FBgn0030976	CG7378	1.29282	0.156382	0.253412
FBgn0000044	Act57B	1.29219	0.011171	0.0266131
FBgn0034736	gas	1.2903	5.42219e-29	1.63139e-27
FBgn0038595	CG7142	1.29024	7.60843e-15	1.04825e-13
FBgn0040609	CG3348	1.29018	4.44181e-06	2.171e-05
FBgn0037506	Mics1	1.2896	4.45467e-06	2.17618e-05
FBgn0265191	Gyg	1.28952	7.5628e-18	1.29049e-16
FBgn0035286	CG13924	1.28776	0.00731472	0.0183114
FBgn0010246	Myo61F	1.28315	2.82777e-78	2.75864e-76
FBgn0010473	tutl	1.28075	0.00445513	0.0117852
FBgn0031001	CG7884	1.27823	0.17753	0.279932
FBgn0036553	CG17027	1.27807	0.429203	0.550643
FBgn0037042	CG12984	1.27565	0.335561	0.456329
FBgn0263773	fok	1.27252	1.49112e-05	6.6734e-05
FBgn0038469	CG4009	1.27123	7.02542e-11	6.74469e-10
FBgn0037534	ELOVL	1.27045	0.38257	0.505315
FBgn0262823	hemo	1.26821	3.65877e-15	5.1737e-14
FBgn0262846	CG43210	1.26821	3.65877e-15	5.1737e-14
FBgn0052213	CG32213	1.26295	0.417402	0.538868
FBgn0262870	axo	1.26261	7.52342e-24	1.86311e-22
FBgn0011591	fng	1.26196	0.00171733	0.00505781
FBgn0263873	sick	1.26092	1.62665e-26	4.42541e-25
FBgn0039590	CG10011	1.26032	7.07489e-30	2.18304e-28
FBgn0039527	CG5639	1.25811	3.71059e-14	4.84282e-13
FBgn0036586	CG13070	1.25743	0.395385	0.518061
FBgn0035143	Ppm1	1.25692	0.00301999	0.00834538
FBgn0000241	bw	1.25398	0.278556	0.395573
FBgn0053147	Hs3st-A	1.25302	0.425447	0.546696
FBgn0010399	Nmdar1	1.25221	0.170023	0.270791
FBgn0040251	Ugt302K1	1.24819	0.0909733	0.161958
FBgn0036895	ms(3)76Cc	1.24756	0.16761	0.267478
FBgn0264339	CG43795	1.24598	0.122797	0.207992
FBgn0004646	ogre	1.24557	0.00380279	0.010239
FBgn0063499	GstE10	1.24538	3.78782e-25	9.78148e-24
FBgn0040904	CG15577	1.24518	0.273539	0.389997
FBgn0086367	t	1.24357	0.0491723	0.0965061
FBgn0260969	CG42592	1.24195	0.404446	0.526897
FBgn0262794	CG43175	1.24186	1.37335e-29	4.18417e-28
FBgn0013813	Dhc98D	1.24142	1.48437e-05	6.65244e-05
FBgn0030310	PGRP-SA	1.23976	3.45583e-24	8.64673e-23
FBgn0032428	CG6405	1.23917	0.00698634	0.0175909
FBgn0032178	Spn31A	1.23214	9.49242e-05	0.000367213
FBgn0033048	CG7881	1.23119	0.281553	0.398657
FBgn0028490	CG31705	1.22737	9.7999e-55	6.18611e-53
FBgn0030077	CG15365	1.22656	0.0356123	0.0730862
FBgn0036899	tey	1.22638	0.43073	0.55209
FBgn0261356	CG42633	1.22578	0.285006	0.402425
FBgn0031034	CG14205	1.22495	0.419044	0.54077
FBgn0265045	Strn-Mlck	1.22479	6.52564e-29	1.95729e-27
FBgn0029532	CG13361	1.22283	0.481056	0.599723
FBgn0030723	dpr18	1.22134	0.131988	0.220467
FBgn0036670	CG13029	1.22011	0.0269361	0.0574788
FBgn0243516	Vrp1	1.21832	1.17096e-45	5.54371e-44
FBgn0011695	EbpIII	1.21671	0.237861	0.349713
FBgn0039239	CG13641	1.21536	0.0749349	0.138273
FBgn0035538	DopEcR	1.21412	0.209477	0.317852
FBgn0053792	CG33792	1.21298	0.459265	0.579265
FBgn0000633	CG17716	1.21269	0.0132238	0.0308864
FBgn0001321	knk	1.2112	0.253371	0.366731
FBgn0036985	zye	1.21086	2.89224e-06	1.46708e-05
FBgn0031515	CG9664	1.21072	0.387425	0.510123
FBgn0025692	Lfg	1.20716	5.96381e-14	7.6492e-13
FBgn0024236	foi	1.20494	1.38961e-44	6.48349e-43
FBgn0052225	CG32225	1.20473	0.250705	0.363942
FBgn0027594	drpr	1.20048	2.92172e-37	1.11976e-35
FBgn0051926	CG31926	1.19966	0.432643	0.554026
FBgn0035806	PGRP-SD	1.19717	1.4039e-13	1.74953e-12
FBgn0051004	mesh	1.19472	0.414664	0.53648
FBgn0003979	Vm26Aa	1.19427	0.443182	0.563859
FBgn0260943	Rbp6	1.19233	0.154357	0.250551
FBgn0031959	spz3	1.19176	0.357588	0.479598
FBgn0261575	tobi	1.19143	0.200785	0.308101
FBgn0053832	His2A:CG33832	1.19089	0.0689493	0.129011
FBgn0040259	Ugt302C1	1.18985	2.69109e-22	6.20299e-21
FBgn0001090	bnb	1.18911	0.291007	0.408985
FBgn0053516	dpr3	1.18849	7.19974e-06	3.3903e-05
FBgn0029810	CG12239	1.18757	0.454054	0.574964
FBgn0259101	CG42249	1.18724	0.434529	0.555778
FBgn0036956	CG13813	1.18549	0.0224743	0.0492166
FBgn0034629	Acox57D-d	1.18322	0.000762889	0.00244621
FBgn0003460	so	1.1752	0.440913	0.561935
FBgn0032899	CG9338	1.17319	0.00131974	0.00401198
FBgn0264895	RapGAP1	1.17134	6.52031e-17	1.04088e-15
FBgn0260768	CG42566	1.17083	0.152751	0.248361
FBgn0003889	betaTub85D	1.16924	0.317939	0.437851
FBgn0051551	CG31551	1.16694	0.368183	0.490606
FBgn0085337	CG34308	1.16616	0.210898	0.319356
FBgn0263258	chas	1.16463	0.103417	0.179706
FBgn0085423	GramD1B	1.16395	1.38469e-51	7.9132e-50
FBgn0035317	Oseg2	1.15904	0.355299	0.477439
FBgn0035293	CG5687	1.15867	0.108433	0.187142
FBgn0038956	CAH8	1.15799	0.470946	0.590778
FBgn0039342	CG5107	1.15713	0.228518	0.339385
FBgn0035237	CG13917	1.15588	9.57398e-32	3.11332e-30
FBgn0027660	blot	1.15224	0.000504941	0.00168279
FBgn0014141	cher	1.14985	1.00073e-53	6.15611e-52
FBgn0026718	Agpat2	1.14878	3.55878e-11	3.5252e-10
FBgn0051324	CG31324	1.14702	2.80257e-33	9.49726e-32
FBgn0031513	CG3347	1.14587	0.216124	0.325686
FBgn0036978	Toll-9	1.14381	0.239759	0.35186
FBgn0039883	RhoGAP100F	1.14366	6.67358e-07	3.72133e-06
FBgn0259228	C3G	1.14333	1.73089e-51	9.77596e-50
FBgn0038975	Nrx-1	1.1405	2.33762e-06	1.20409e-05
FBgn0033093	CG3270	1.13894	0.0145376	0.0335414
FBgn0031745	rau	1.13492	0.291444	0.409421
FBgn0023407	B4	1.13206	8.92459e-72	7.7652e-70
FBgn0030260	CG1537	1.13179	0.00550094	0.014232
FBgn0052681	CG32681	1.13168	2.70212e-06	1.37934e-05
FBgn0263748	CG43673	1.13097	0.131102	0.219305
FBgn0259209	Mlp60A	1.13046	0.502853	0.618039
FBgn0031763	CG13996	1.12971	0.367716	0.490119
FBgn0040398	CG14629	1.12773	5.9564e-16	8.86394e-15
FBgn0041626	Or19a	1.1253	0.173178	0.274593
FBgn0033438	Mmp2	1.12529	1.25412e-53	7.61777e-52
FBgn0041709	yellow-g	1.1246	0.162844	0.261674
FBgn0015380	drl	1.12458	0.184499	0.287866
FBgn0002719	Men	1.12426	1.71277e-55	1.1102e-53
FBgn0035476	CG12766	1.12352	0.149987	0.244898
FBgn0047095	CG33939	1.12342	0.247846	0.361149
FBgn0025643	CG3588	1.12192	0.529833	0.643421
FBgn0037078	CG12971	1.12024	0.230243	0.341318
FBgn0085599	CG41284	1.11761	0.162053	0.260808
FBgn0010434	cora	1.1176	3.8044e-51	2.09959e-49
FBgn0033304	Cyp6a13	1.11709	0.0261118	0.055992
FBgn0259245	DIP-beta	1.11695	0.113502	0.194673
FBgn0029762	NAAT1	1.1159	0.179788	0.282662
FBgn0261446	CG13377	1.11433	0.390246	0.512719
FBgn0031296	CG4415	1.11045	0.130566	0.218584
FBgn0031343	CG18131	1.10541	0.140173	0.232032
FBgn0050285	CG30285	1.10462	0.00424458	0.0112776
FBgn0019929	Ser7	1.10361	0.0450647	0.0895544
FBgn0002592	E(spl)m2-BFM	1.10272	0.408273	0.530201
FBgn0030667	CG15599	1.10112	0.357562	0.479598
FBgn0038957	CG7059	1.09822	0.00411027	0.010969
FBgn0035348	CG16758	1.09787	0.00139056	0.00420083
FBgn0032495	CG16820	1.09774	0.351058	0.472942
FBgn0034219	mthl4	1.09663	1.28142e-28	3.7963e-27
FBgn0259685	crb	1.09655	5.17684e-13	6.1197e-12
FBgn0035512	Cpr64Ac	1.09521	0.232305	0.343583
FBgn0038260	CG14855	1.09509	0.0793736	0.145023
FBgn0037186	CG11241	1.09484	0.0213883	0.047176
FBgn0003187	qua	1.09435	0.0621736	0.118019
FBgn0259150	OtopLc	1.09394	0.18209	0.28526
FBgn0030195	CG2898	1.09386	0.00182899	0.00535609
FBgn0010040	GstD4	1.09247	0.0947043	0.167427
FBgn0038394	CG10264	1.09166	0.000731131	0.00235219
FBgn0010043	GstD7	1.09032	0.294747	0.41286
FBgn0033736	CG13154	1.08969	0.157379	0.254857
FBgn0021776	mira	1.08951	0.216669	0.326229
FBgn0250785	vari	1.08661	6.22618e-39	2.516e-37
FBgn0034070	SP2353	1.08393	0.202952	0.310488
FBgn0032706	Irk3	1.08356	0.0320714	0.0668853
FBgn0262141	CG42867	1.08233	0.167311	0.26709
FBgn0053124	CG33124	1.08077	0.244008	0.356684
FBgn0033203	CG2070	1.08069	0.195385	0.301447
FBgn0033153	Gadd45	1.07698	7.47668e-39	3.00874e-37
FBgn0040805	CG12355	1.07607	0.0491483	0.0964785
FBgn0038113	CG11668	1.07135	0.56181	0.673129
FBgn0261788	Ank2	1.07076	0.216491	0.326042
FBgn0038419	CG14879	1.06976	1.97417e-10	1.81759e-09
FBgn0085446	CG34417	1.06646	7.21081e-34	2.49613e-32
FBgn0038198	Npc2b	1.06603	4.42971e-13	5.26225e-12
FBgn0031257	CG4133	1.06375	0.00787792	0.0196196
FBgn0028886	CG15279	1.06371	3.51042e-08	2.39264e-07
FBgn0010038	GstD2	1.06333	0.00372339	0.0100445
FBgn0010014	CanB	1.0627	0.19846	0.305309
FBgn0034804	CG3831	1.06206	2.06239e-31	6.66173e-30
FBgn0263077	CG43340	1.06203	1.47173e-22	3.43333e-21
FBgn0005586	Rab3	1.05875	0.297505	0.415938
FBgn0040365	CG14628	1.05723	1.62411e-05	7.22508e-05
FBgn0051343	CG31343	1.0568	0.328347	0.448921
FBgn0020386	Pdk1	1.05575	1.07542e-40	4.53554e-39
FBgn0036752	Adgf-A	1.0544	4.3178e-28	1.24482e-26
FBgn0050015	CG30015	1.05236	1.23389e-70	1.03625e-68
FBgn0034007	ND-51L2	1.05149	0.363008	0.485405
FBgn0032211	CG13138	1.05091	0.156157	0.253132
FBgn0031397	CG15385	1.05007	0.000321271	0.00112218
FBgn0035649	CG10483	1.04816	0.195793	0.301782
FBgn0032074	Tsp29Fa	1.04625	0.186575	0.29058
FBgn0039938	Sox102F	1.04466	0.202757	0.310239
FBgn0035173	CG13907	1.04239	3.30591e-19	6.28513e-18
FBgn0033234	MFS12	1.04112	0.000877108	0.00276743
FBgn0262893	CG43248	1.04005	0.303873	0.422821
FBgn0052436	CG32436	1.03902	0.000800975	0.00255139
FBgn0039494	grass	1.03809	1.43356e-13	1.78419e-12
FBgn0037736	side-VII	1.037	0.133971	0.223239
FBgn0032797	Hasp	1.03353	0.00147282	0.00442305
FBgn0002921	Atpalpha	1.03084	6.20912e-50	3.25911e-48
FBgn0034072	Dg	1.0289	3.62118e-24	9.01375e-23
FBgn0038143	CG9813	1.02857	0.036946	0.0754864
FBgn0003366	sev	1.02854	2.94083e-07	1.74785e-06
FBgn0031693	Cyp4ac1	1.0278	0.179353	0.282254
FBgn0038279	Sdr	1.0277	0.0544944	0.105304
FBgn0262123	l(2)41Ab	1.02768	0.0114079	0.0271386
FBgn0036165	chrb	1.02741	2.45023e-12	2.7138e-11
FBgn0014135	bnl	1.02569	4.3421e-23	1.03802e-21
FBgn0261570	raskol	1.02499	2.0064e-37	7.75111e-36
FBgn0013953	Esp	1.02412	0.0712271	0.132667
FBgn0285917	sbb	1.02344	1.56183e-42	6.85643e-41
FBgn0016081	fry	1.02262	5.24278e-51	2.87698e-49
FBgn0033222	CG12824	1.02191	0.123168	0.208511
FBgn0027560	Tps1	1.02183	0.481753	0.599893
FBgn0034047	CG12970	1.02129	0.195576	0.30164
FBgn0053806	His3:CG33806	1.0204	0.0827482	0.150069
FBgn0045064	bwa	1.01868	1.17388e-39	4.8868e-38
FBgn0261999	Ca-Ma2d	1.01837	0.0455395	0.0903308
FBgn0041225	Gr94a	1.01757	0.00157121	0.00467347
FBgn0263316	Mrp4	1.01753	1.11377e-22	2.64294e-21
FBgn0052214	CG32214	1.01686	0.341152	0.462629
FBgn0263780	CG17684	1.01546	0.296805	0.41514
FBgn0026592	Fie	1.01071	2.8198e-05	0.000120556
FBgn0033963	CG12857	1.01025	0.419358	0.541104
FBgn0035638	Tektin-C	1.00959	0.17252	0.273686
FBgn0037664	CG8420	1.0089	0.394465	0.517137
FBgn0037003	CG18281	1.00375	0.00751529	0.0187552
FBgn0035496	CG14990	0.998129	0.259769	0.373883
FBgn0003891	tud	0.997931	2.16985e-13	2.66283e-12
FBgn0038874	ETHR	0.996888	0.486589	0.604513
FBgn0038850	CG17279	0.995417	0.226062	0.336256
FBgn0261260	mgl	0.995413	1.21527e-22	2.87674e-21
FBgn0003048	pcx	0.994683	1.48018e-39	6.13545e-38
FBgn0030272	CG15201	0.993751	0.404562	0.52694
FBgn0011829	Ret	0.992762	8.72637e-09	6.50806e-08
FBgn0286852	naz	0.990109	0.342883	0.464651
FBgn0036977	CG5665	0.989943	0.301225	0.419936
FBgn0032587	CG5953	0.98818	2.52346e-33	8.58153e-32
FBgn0260646	CG42538	0.987142	0.327585	0.448069
FBgn0032143	CG4017	0.984436	0.530434	0.643746
FBgn0040371	CG12470	0.983555	0.339393	0.460437
FBgn0034540	Lrt	0.983232	0.246657	0.359688
FBgn0015010	Ag5r	0.982937	0.319047	0.439189
FBgn0015577	alpha-Est9	0.982908	1.5022e-26	4.09838e-25
FBgn0259823	CG42404	0.981906	0.113957	0.19528
FBgn0010039	GstD3	0.980777	1.0322e-28	3.07683e-27
FBgn0022774	Oat	0.976319	4.88677e-09	3.76367e-08
FBgn0014019	Rh5	0.97607	0.56167	0.673112
FBgn0038435	Gyc89Da	0.975234	0.14225	0.234742
FBgn0036368	CG10738	0.975135	0.034098	0.0705178
FBgn0011676	Nos	0.974398	0.0032772	0.00898672
FBgn0051875	CG31875	0.97352	9.04773e-05	0.000351783
FBgn0050069	CG30069	0.972636	5.35938e-09	4.09501e-08
FBgn0050354	UQCR-11L	0.97228	0.489807	0.607494
FBgn0030425	Nep6	0.970888	0.000311334	0.00109182
FBgn0053238	Ste:CG33238	0.96654	0.323195	0.443402
FBgn0058160	CG40160	0.966537	0.0260526	0.0559148
FBgn0085362	Vml	0.966413	0.507623	0.62216
FBgn0035266	Gk2	0.966014	2.27766e-22	5.2626e-21
FBgn0038652	CG7720	0.965963	8.00379e-07	4.4197e-06
FBgn0036997	CG5955	0.965143	2.43656e-05	0.000105574
FBgn0035983	CG4080	0.964332	3.98929e-27	1.12987e-25
FBgn0053144	CG33144	0.963889	3.31675e-21	7.07134e-20
FBgn0266721	gammaSnap2	0.963707	0.430662	0.55209
FBgn0032151	nAChRalpha6	0.963419	0.33717	0.457936
FBgn0029531	CG13362	0.962757	0.237733	0.349684
FBgn0284227	CG46311	0.962644	2.71394e-17	4.43506e-16
FBgn0041605	cpx	0.961863	3.92988e-13	4.70904e-12
FBgn0259678	sqa	0.961531	0.247266	0.360412
FBgn0025574	Pli	0.959473	5.69201e-27	1.59806e-25
FBgn0053846	His1:CG33846	0.959456	0.246267	0.359336
FBgn0263346	smash	0.959448	1.54419e-25	4.09721e-24
FBgn0030073	CG10962	0.958501	3.34033e-19	6.33809e-18
FBgn0263390	Nha2	0.957907	0.238106	0.35002
FBgn0029662	CG12206	0.956122	8.27177e-05	0.000324619
FBgn0034331	BomBc2	0.955409	1.69452e-05	7.52444e-05
FBgn0036870	CG14095	0.95475	0.0209725	0.0463898
FBgn0035719	tow	0.954706	0.0317196	0.0662516
FBgn0286511	Pld	0.951532	4.47277e-18	7.81157e-17
FBgn0286723	hll	0.950936	0.049191	0.096523
FBgn0029987	CG15330	0.950865	0.167357	0.267118
FBgn0263490	mld	0.949135	2.80128e-41	1.19711e-39
FBgn0266569	CG42259	0.948866	3.85124e-19	7.26469e-18
FBgn0264273	Sema2b	0.946442	0.48693	0.60478
FBgn0051313	CG31313	0.94554	0.259109	0.373337
FBgn0039637	Ctl2	0.944651	6.55266e-28	1.8835e-26
FBgn0003997	hid	0.941856	3.16838e-07	1.87043e-06
FBgn0035208	CG9184	0.940679	0.0608693	0.115838
FBgn0043783	CG32444	0.938951	0.472661	0.592469
FBgn0022382	Pka-R2	0.933996	5.56198e-18	9.60959e-17
FBgn0038866	CG5810	0.933781	0.0519219	0.101142
FBgn0261799	dsx-c73A	0.932864	0.48188	0.599973
FBgn0000064	Ald1	0.932016	2.3641e-25	6.18766e-24
FBgn0039492	CG6051	0.931299	9.5479e-38	3.74852e-36
FBgn0033821	CG10799	0.930636	0.466758	0.58682
FBgn0264449	CG43867	0.92979	7.93609e-27	2.20884e-25
FBgn0259926	CG42449	0.92976	0.332341	0.452715
FBgn0034756	Cyp6d2	0.929052	0.0779482	0.142905
FBgn0040658	CG13516	0.928594	0.551005	0.663459
FBgn0040368	eIF4E7	0.928594	0.319829	0.440078
FBgn0035262	CG18171	0.928151	0.0114822	0.0272816
FBgn0030455	CG4318	0.926461	0.424745	0.546085
FBgn0031850	Tsp	0.926316	1.2072e-23	2.95169e-22
FBgn0001085	fz	0.924967	1.20904e-13	1.51452e-12
FBgn0264953	Piezo	0.924791	1.51894e-15	2.21213e-14
FBgn0032783	CG10237	0.923974	9.88874e-11	9.37246e-10
FBgn0023197	Jon74E	0.923935	0.556883	0.668527
FBgn0030343	ATP7	0.923536	1.03076e-34	3.68707e-33
FBgn0053819	His1:CG33819	0.923441	0.312804	0.432383
FBgn0033054	CG14591	0.921415	0.00336036	0.00919126
FBgn0035969	CG4476	0.91981	0.362483	0.485085
FBgn0002577	m	0.919588	9.67914e-12	1.00302e-10
FBgn0030332	CG9360	0.919035	0.00636656	0.0161811
FBgn0037005	CG5078	0.916856	0.216971	0.326504
FBgn0038221	IFT54	0.915314	0.244766	0.357673
FBgn0033095	chk	0.914304	9.24434e-21	1.91592e-19
FBgn0266525	CG45092	0.914304	9.24434e-21	1.91592e-19
FBgn0259992	CG42489	0.913985	0.305578	0.424582
FBgn0002926	ndl	0.913909	0.425927	0.547127
FBgn0033113	Spn42Dc	0.91341	0.000376998	0.00129667
FBgn0015036	Cyp4ae1	0.912821	0.00262546	0.00736258
FBgn0011656	Mef2	0.912665	3.00586e-28	8.71791e-27
FBgn0262102	CG42855	0.912571	1.42179e-08	1.02628e-07
FBgn0037004	CG17637	0.91138	0.0962293	0.169595
FBgn0031632	CG15628	0.910807	0.45387	0.574807
FBgn0034321	CG14502	0.909773	4.35473e-06	2.13276e-05
FBgn0050389	CG30389	0.908911	5.41999e-50	2.86045e-48
FBgn0261873	sdt	0.908639	7.50499e-14	9.51223e-13
FBgn0264542	hwt	0.90733	0.000418778	0.00142264
FBgn0053843	His1:CG33843	0.906231	0.355379	0.477439
FBgn0003071	Pfk	0.905317	1.01475e-18	1.86675e-17
FBgn0038262	CG14857	0.903	0.000385718	0.00132148
FBgn0261671	tweek	0.902626	1.66349e-14	2.23449e-13
FBgn0036459	CG3349	0.901861	0.489871	0.607495
FBgn0037521	CG2993	0.901337	0.428587	0.550145
FBgn0033365	CG8170	0.900919	0.475815	0.595108
FBgn0036316	CG10960	0.899851	7.35534e-10	6.26436e-09
FBgn0029834	CG5937	0.899376	0.00494906	0.0129149
FBgn0024244	drm	0.898258	0.399348	0.522191
FBgn0037146	CG7470	0.895881	0.445027	0.565834
FBgn0262477	FoxP	0.894891	0.439332	0.560622
FBgn0038247	Cad88C	0.894525	0.163626	0.262552
FBgn0039312	CG10514	0.894439	3.71813e-06	1.84058e-05
FBgn0035455	CG10862	0.894141	0.401252	0.52419
FBgn0259221	ATP8A	0.892351	4.9082e-20	9.7739e-19
FBgn0010424	TpnC73F	0.891191	0.16316	0.262109
FBgn0034322	CG18536	0.890487	0.0232226	0.0505371
FBgn0051414	Gba1b	0.889959	0.577834	0.68643
FBgn0031690	CG7742	0.888818	0.463068	0.583091
FBgn0023090	dtr	0.887866	0.055579	0.107135
FBgn0023489	Pph13	0.887815	0.522286	0.636739
FBgn0052476	mthl14	0.886858	0.000107469	0.000412371
FBgn0035439	CG14961	0.886321	5.7181e-08	3.78775e-07
FBgn0051617	His1:CG31617	0.884977	0.114554	0.196024
FBgn0263120	Acsl	0.884817	1.66509e-17	2.75366e-16
FBgn0043025	Adgf-A2	0.884609	0.00322226	0.00884862
FBgn0263593	Lpin	0.883864	4.65546e-29	1.40508e-27
FBgn0262617	Nuak1	0.883136	1.43657e-19	2.78044e-18
FBgn0086778	nAChRalpha7	0.883004	0.404084	0.526602
FBgn0021764	sdk	0.882965	1.98662e-10	1.82731e-09
FBgn0283471	wupA	0.881737	0.295606	0.413763
FBgn0034356	Pepck2	0.880677	8.30806e-18	1.40771e-16
FBgn0036449	bmm	0.878005	3.65578e-19	6.92303e-18
FBgn0041337	Cyp309a2	0.877611	0.468225	0.588204
FBgn0053465	CG33465	0.874927	0.482102	0.600173
FBgn0043903	dome	0.873352	1.5711e-18	2.84151e-17
FBgn0053920	CG33920	0.873197	0.288046	0.405649
FBgn0039411	dysf	0.872016	8.4717e-12	8.84537e-11
FBgn0039430	CG5455	0.871443	3.53509e-24	8.8222e-23
FBgn0050008	CG30008	0.871346	0.577664	0.686402
FBgn0026616	alpha-Man-IIb	0.870907	1.7786e-08	1.26214e-07
FBgn0286507	vrs	0.870553	0.482601	0.600639
FBgn0051221	CG31221	0.870525	0.583044	0.690926
FBgn0035432	ZnT63C	0.869111	1.13148e-60	7.97652e-59
FBgn0053993	CG33993	0.867813	0.457519	0.577989
FBgn0035968	Slc45-1	0.863441	9.69202e-07	5.2617e-06
FBgn0033582	CG9084	0.863334	0.521702	0.636415
FBgn0032638	SPH93	0.862885	0.00719157	0.0180423
FBgn0029930	CG12541	0.862681	0.431516	0.552803
FBgn0028509	CenG1A	0.862614	7.80926e-19	1.45042e-17
FBgn0052594	be	0.861962	8.60196e-17	1.36866e-15
FBgn0052532	CG32532	0.85884	0.292735	0.410696
FBgn0030757	CG9902	0.85811	1.14045e-11	1.17425e-10
FBgn0031568	CG10019	0.856905	0.45701	0.577451
FBgn0033798	CG15870	0.856584	0.093884	0.166129
FBgn0033423	Alp6	0.856159	4.0609e-08	2.74459e-07
FBgn0034391	CG15080	0.855639	6.46563e-05	0.000257931
FBgn0026374	Rhp	0.855482	2.41852e-10	2.19888e-09
FBgn0035131	mthl9	0.855325	0.01232	0.029007
FBgn0028956	mthl3	0.852204	7.8767e-14	9.97028e-13
FBgn0039232	sosie	0.852104	0.505756	0.620502
FBgn0034013	unc-5	0.851745	1.30024e-16	2.032e-15
FBgn0038853	RhoGAP93B	0.851607	9.09e-33	3.04831e-31
FBgn0034067	CG8399	0.850496	1.12741e-09	9.39473e-09
FBgn0038412	Zip89B	0.850198	0.23431	0.346124
FBgn0043069	MESK4	0.849886	2.7205e-09	2.1643e-08
FBgn0039783	PH4alphaNE2	0.848454	6.83799e-13	7.98565e-12
FBgn0031055	et	0.848403	0.0325798	0.0677845
FBgn0086347	Myo31DF	0.847797	1.06038e-46	5.17229e-45
FBgn0036043	Ae2	0.847789	7.41631e-12	7.83662e-11
FBgn0005636	nvy	0.847468	0.00113772	0.00350052
FBgn0039064	CG4467	0.845997	0.60862	0.713356
FBgn0040918	schlank	0.845517	2.65826e-25	6.93878e-24
FBgn0000536	eas	0.845064	2.72835e-14	3.59487e-13
FBgn0004852	Ac76E	0.843318	3.44302e-22	7.86115e-21
FBgn0085451	htk	0.842408	2.49975e-16	3.83216e-15
FBgn0286199	shps	0.842241	0.548745	0.661894
FBgn0034931	CG2812	0.841667	0.13602	0.226223
FBgn0033873	CG6337	0.84096	3.61733e-06	1.7962e-05
FBgn0003396	shn	0.840826	3.03523e-18	5.33957e-17
FBgn0034639	CG15673	0.837562	0.0409592	0.0824649
FBgn0052082	IRSp53	0.836868	5.30088e-14	6.81704e-13
FBgn0260442	rhea	0.834926	1.72076e-22	3.99499e-21
FBgn0033893	CG18371	0.83443	0.405343	0.52746
FBgn0264753	Rgk1	0.833333	0.287559	0.405083
FBgn0030614	CG9072	0.831979	0.591275	0.698366
FBgn0027948	msps	0.830892	1.32326e-12	1.52496e-11
FBgn0010051	Itpr	0.8308	2.09416e-16	3.21548e-15
FBgn0264357	SNF4Agamma	0.830547	6.51994e-27	1.82521e-25
FBgn0001150	gt	0.830171	0.0452243	0.0897978
FBgn0040837	CG8620	0.830103	0.000614923	0.00201456
FBgn0004865	Eip78C	0.829479	0.000136105	0.000511081
FBgn0030674	HUWE1	0.828271	1.2125e-19	2.38015e-18
FBgn0032350	CG6287	0.826894	1.29766e-11	1.32763e-10
FBgn0033033	scaf	0.825881	1.42269e-22	3.33503e-21
FBgn0000046	Act87E	0.82567	0.01306	0.0305753
FBgn0030695	PGRP-LE	0.824621	0.000189981	0.000690046
FBgn0031170	ABCA	0.824184	1.10426e-12	1.2803e-11
FBgn0021872	Xbp1	0.823881	3.54707e-23	8.54305e-22
FBgn0031835	CG11319	0.823772	0.434421	0.555714
FBgn0034389	Mctp	0.822714	6.13342e-14	7.82518e-13
FBgn0004595	pros	0.818214	0.575833	0.684901
FBgn0039424	ppk15	0.818033	0.584771	0.692462
FBgn0016919	nompB	0.817354	0.117358	0.200467
FBgn0038980	Octbeta1R	0.816924	0.565234	0.675654
FBgn0032968	CG11634	0.816915	5.4262e-10	4.68622e-09
FBgn0033652	ths	0.812303	0.221877	0.331563
FBgn0032639	CG18563	0.811478	0.253236	0.366731
FBgn0000579	Eno	0.810544	4.07637e-13	4.87688e-12
FBgn0040236	c11.1	0.810401	1.51734e-31	4.91762e-30
FBgn0033635	Prip	0.809962	4.91758e-09	3.78438e-08
FBgn0250788	beta-Spec	0.809836	2.15428e-18	3.83876e-17
FBgn0000116	Argk	0.808424	7.35383e-09	5.5271e-08
FBgn0003890	betaTub97EF	0.80778	2.02627e-09	1.64175e-08
FBgn0025625	Sik2	0.807453	2.48884e-06	1.27654e-05
FBgn0000808	gd	0.807064	0.530165	0.643581
FBgn0030590	CG9518	0.80698	0.219327	0.329075
FBgn0261393	alpha-Est5	0.804804	0.100285	0.175145
FBgn0039152	Root	0.804101	0.626522	0.728607
FBgn0035019	Ir60e	0.803945	0.617374	0.720977
FBgn0024732	Drep1	0.802399	3.30009e-14	4.31874e-13
FBgn0003862	trx	0.801005	6.48539e-11	6.23864e-10
FBgn0015222	Fer1HCH	0.800612	6.41403e-11	6.17614e-10
FBgn0039071	bb8	0.799748	0.281646	0.39873
FBgn0023095	caps	0.795457	2.78716e-07	1.66471e-06
FBgn0000180	bib	0.794521	0.267781	0.383486
FBgn0086251	del	0.794295	9.49706e-10	7.98977e-09
FBgn0053647	CG33647	0.793951	3.21995e-05	0.000136756
FBgn0003888	betaTub60D	0.793941	4.77902e-50	2.53603e-48
FBgn0030261	CG15203	0.793663	1.40252e-06	7.45489e-06
FBgn0040370	CG13375	0.792231	0.0112949	0.0268884
FBgn0052137	CG32137	0.792033	0.508866	0.623289
FBgn0266717	Bruce	0.790932	5.804e-10	4.98267e-09
FBgn0020306	dom	0.790474	2.08105e-21	4.48176e-20
FBgn0052057	dpr10	0.789981	0.564063	0.674807
FBgn0003310	S	0.788411	2.83839e-21	6.0783e-20
FBgn0036288	CG10660	0.787747	1.37636e-13	1.71743e-12
FBgn0261998	CG42816	0.787742	0.37054	0.492726
FBgn0016754	sba	0.782483	1.05519e-26	2.92845e-25
FBgn0025702	Srpk79D	0.780713	0.0341662	0.0706135
FBgn0051473	CG31473	0.779667	0.336718	0.457515
FBgn0051272	CG31272	0.778627	0.443797	0.564552
FBgn0001092	Gapdh2	0.778447	5.31142e-18	9.20963e-17
FBgn0004657	mys	0.777612	1.90319e-44	8.67026e-43
FBgn0040843	CG15213	0.776796	0.678818	0.769848
FBgn0010488	NAT1	0.776689	2.22816e-27	6.32928e-26
FBgn0041710	yellow-f	0.775328	6.17041e-15	8.58701e-14
FBgn0262599	SmydA-3	0.774882	0.231512	0.342548
FBgn0031181	Ir20a	0.774769	0.110415	0.190188
FBgn0000036	nAChRalpha1	0.774409	0.592589	0.69949
FBgn0033638	CG9005	0.773931	1.07886e-26	2.98556e-25
FBgn0040357	CG14624	0.773862	0.468179	0.588204
FBgn0052767	CG32767	0.773431	1.55853e-15	2.26351e-14
FBgn0259212	cno	0.77329	1.38947e-19	2.6994e-18
FBgn0035101	p130CAS	0.770213	4.29273e-15	6.04362e-14
FBgn0010414	SerT	0.769707	0.249648	0.362899
FBgn0033192	Corin	0.769399	0.176609	0.278662
FBgn0026315	Ugt35A1	0.769293	2.20226e-11	2.21096e-10
FBgn0032167	CG5853	0.764615	4.85858e-12	5.25467e-11
FBgn0053143	CG33143	0.764449	0.259036	0.373287
FBgn0034372	Gint3	0.763319	4.64026e-32	1.53478e-30
FBgn0259202	CG42306	0.763319	4.64026e-32	1.53478e-30
FBgn0034582	Cht9	0.762004	0.397142	0.519729
FBgn0036663	CG9674	0.761487	1.92237e-28	5.64324e-27
FBgn0261283	SREBP	0.76088	4.88073e-32	1.60881e-30
FBgn0260632	dl	0.759999	2.86305e-19	5.45392e-18
FBgn0264606	Fife	0.759684	0.353771	0.475613
FBgn0039914	mav	0.758832	4.04669e-11	3.97589e-10
FBgn0262821	CG43192	0.758772	0.0465547	0.0920797
FBgn0039321	CG10550	0.757435	3.70725e-06	1.83708e-05
FBgn0020299	stumps	0.756924	0.428717	0.550239
FBgn0028540	CG9008	0.756664	0.00135737	0.00410698
FBgn0039098	GILT3	0.755712	5.11537e-05	0.000208457
FBgn0033159	Dscam1	0.755598	3.04504e-17	4.95101e-16
FBgn0022709	Adk1	0.755033	3.38259e-05	0.000142972
FBgn0037623	CG9801	0.754851	0.0860052	0.154825
FBgn0039026	CG7029	0.754826	1.03313e-21	2.2938e-20
FBgn0267336	Glut4EF	0.754695	3.06773e-13	3.7128e-12
FBgn0266489	CG45088	0.753672	2.37414e-20	4.80702e-19
FBgn0032208	Ufd4	0.751574	2.81973e-13	3.42985e-12
FBgn0052686	CG32686	0.751199	0.273999	0.390481
FBgn0028703	Nhe3	0.750839	3.4458e-18	6.0289e-17
FBgn0051244	CG31244	0.750372	0.490859	0.608329
FBgn0031432	Cyp309a1	0.750095	0.560435	0.671716
FBgn0040765	luna	0.749514	1.06607e-08	7.83573e-08
FBgn0284435	tyn	0.748909	1.59704e-06	8.41932e-06
FBgn0037166	CG11426	0.748538	2.81768e-06	1.43303e-05
FBgn0000244	by	0.748507	1.60489e-07	9.92956e-07
FBgn0052062	Rbfox1	0.74835	2.37906e-09	1.90997e-08
FBgn0036007	path	0.748262	9.5205e-11	9.04119e-10
FBgn0264707	RhoGEF3	0.748182	3.72146e-19	7.03363e-18
FBgn0259233	CG42331	0.747899	0.0411292	0.0827899
FBgn0052982	CG32982	0.747606	2.24289e-10	2.05325e-09
FBgn0005427	ewg	0.747367	1.4145e-11	1.43954e-10
FBgn0035400	CG11537	0.746079	7.03507e-33	2.36741e-31
FBgn0039380	CG5890	0.745502	0.132422	0.221077
FBgn0029155	Men-b	0.745252	9.08319e-28	2.60313e-26
FBgn0085421	Epac	0.74517	8.66397e-07	4.74896e-06
FBgn0029659	CG16782	0.744377	0.307328	0.42591
FBgn0036311	CG17666	0.743938	0.0359045	0.0736139
FBgn0263084	HP1Lcsd	0.743551	0.34644	0.468222
FBgn0030984	tgy	0.741049	0.306105	0.425069
FBgn0051668	CG31668	0.740805	0.433646	0.554942
FBgn0034501	CG13868	0.739943	1.63317e-30	5.13785e-29
FBgn0261262	CG42613	0.739931	2.11897e-18	3.78282e-17
FBgn0263983	CG43732	0.739608	5.56583e-25	1.42586e-23
FBgn0037721	CG9427	0.739091	0.304453	0.423364
FBgn0004364	18w	0.738951	0.000148463	0.000552332
FBgn0024277	trio	0.738145	4.30698e-21	9.12211e-20
FBgn0052774	Muc4B	0.734741	0.566865	0.67707
FBgn0040212	Dhap-at	0.734228	1.30065e-22	3.07131e-21
FBgn0250789	alpha-Spec	0.73281	5.49573e-17	8.83158e-16
FBgn0040355	CG3526	0.732594	0.275873	0.392579
FBgn0003015	osk	0.73167	5.2542e-06	2.54106e-05
FBgn0029091	Chs2	0.730054	0.546857	0.660028
FBgn0030348	CG10352	0.729694	0.213346	0.322154
FBgn0260003	Dys	0.729433	1.81996e-08	1.29054e-07
FBgn0032889	CG9331	0.729386	1.45796e-12	1.66837e-11
FBgn0286070	cnk	0.72925	7.219e-15	9.98869e-14
FBgn0053556	form3	0.727313	0.325344	0.445509
FBgn0003386	Shaw	0.725972	0.462405	0.58256
FBgn0032123	Oatp30B	0.724926	9.24769e-06	4.28571e-05
FBgn0004878	cas	0.724004	0.574263	0.683421
FBgn0265512	mlt	0.723982	2.65067e-07	1.59205e-06
FBgn0027581	CG6191	0.723493	5.03869e-18	8.75246e-17
FBgn0035196	CG9129	0.723423	0.433509	0.554942
FBgn0031975	Tg	0.723365	0.000226136	0.000810998
FBgn0032590	CG4631	0.723082	0.234822	0.346405
FBgn0023215	Mnt	0.722663	1.6207e-08	1.15946e-07
FBgn0030816	CG16700	0.720997	0.0255044	0.0548477
FBgn0039451	CG6420	0.720569	1.61229e-08	1.15515e-07
FBgn0001137	grk	0.720389	6.53199e-11	6.27721e-10
FBgn0034626	CG10795	0.719826	1.98364e-12	2.23547e-11
FBgn0011592	fra	0.719345	1.73806e-07	1.06605e-06
FBgn0052813	CG32813	0.719211	1.07596e-06	5.80863e-06
FBgn0003520	stau	0.719024	8.27604e-12	8.65043e-11
FBgn0023172	RhoGEF2	0.718451	3.33796e-16	5.06887e-15
FBgn0261561	CG42675	0.718433	0.00112764	0.00347502
FBgn0043884	mask	0.716685	2.22355e-18	3.95488e-17
FBgn0051674	CG31674	0.713711	1.0241e-07	6.52617e-07
FBgn0001168	h	0.713529	1.05263e-21	2.33173e-20
FBgn0032935	Atg18b	0.711124	1.74148e-20	3.54088e-19
FBgn0053243	Ste:CG33243	0.710637	0.420263	0.541908
FBgn0026189	prominin-like	0.710008	4.45341e-11	4.35334e-10
FBgn0036518	RhoGAP71E	0.709936	1.99665e-17	3.29073e-16
FBgn0261588	pdm3	0.70948	0.570315	0.67976
FBgn0259789	zld	0.707369	0.493778	0.610466
FBgn0052985	CG32985	0.705931	5.44449e-07	3.09311e-06
FBgn0031142	r-cup	0.70564	0.118151	0.201642
FBgn0261574	kug	0.704918	3.68945e-06	1.82919e-05
FBgn0029881	pigs	0.704664	7.80264e-12	8.20892e-11
FBgn0039109	CG10365	0.704548	2.84212e-15	4.04259e-14
FBgn0036279	Ncc69	0.7043	8.39415e-09	6.2727e-08
FBgn0053469	CG33469	0.703916	0.0721464	0.134075
FBgn0262699	fzr	0.703203	2.03257e-19	3.9027e-18
FBgn0039225	Ets96B	0.702599	1.05114e-09	8.79715e-09
FBgn0039972	Marf1	0.702594	8.12853e-09	6.08569e-08
FBgn0037000	ZnT77C	0.701413	2.19876e-05	9.59584e-05
FBgn0266557	kis	0.700474	1.59279e-08	1.14288e-07
FBgn0039054	Cow	0.698778	0.331733	0.452206
FBgn0000542	ec	0.697643	0.0135513	0.0315446
FBgn0034435	fest	0.697539	0.00309959	0.00854139
FBgn0034822	RpL37b	0.69658	0.52855	0.642186
FBgn0037849	CG4596	0.69615	0.25515	0.368604
FBgn0010504	kermit	0.695598	3.68201e-25	9.53374e-24
FBgn0029843	Nep1	0.695366	0.200939	0.308239
FBgn0038727	CG7432	0.694893	0.626687	0.728607
FBgn0015737	Hmu	0.694638	7.69737e-30	2.36755e-28
FBgn0261055	Sfp26Ad	0.69454	0.0179803	0.0405355
FBgn0032363	Dlg5	0.69447	1.96482e-16	3.02169e-15
FBgn0035777	CG8563	0.694195	0.00110769	0.00341682
FBgn0052369	CG32369	0.693769	1.07637e-08	7.90539e-08
FBgn0261602	RpL8	0.69369	0.0812818	0.14781
FBgn0001316	klar	0.693493	8.48384e-25	2.16192e-23
FBgn0004387	Klp98A	0.691646	1.4091e-17	2.34235e-16
FBgn0016013	Faa	0.691425	0.239247	0.351482
FBgn0042207	CG18530	0.690849	0.29938	0.417834
FBgn0004045	Yp1	0.690761	0.321886	0.44198
FBgn0040849	Ir41a	0.690624	0.388373	0.510884
FBgn0261554	CG42672	0.690103	1.69716e-16	2.63523e-15
FBgn0052459	CG32459	0.688349	0.630268	0.732066
FBgn0053127	CG33127	0.688282	0.077407	0.142048
FBgn0053470	CG33470	0.688181	0.606259	0.71107
FBgn0262111	f	0.687915	6.54386e-07	3.66312e-06
FBgn0259834	out	0.687451	7.77688e-05	0.000306193
FBgn0052451	SPoCk	0.687368	2.53777e-17	4.15421e-16
FBgn0051274	CG31274	0.68634	8.48371e-07	4.65808e-06
FBgn0037717	CG8301	0.686047	7.64406e-12	8.06845e-11
FBgn0053808	His2A:CG33808	0.683633	0.610968	0.715326
FBgn0033744	Dh44-R2	0.682722	0.102647	0.178592
FBgn0000357	Cp18	0.679224	0.596306	0.702847
FBgn0053138	AGBE	0.678857	2.40413e-10	2.19048e-09
FBgn0038851	dmrt93B	0.678155	0.469045	0.588928
FBgn0001324	kto	0.678	1.27198e-15	1.85851e-14
FBgn0051988	CG31988	0.677975	0.261583	0.376004
FBgn0030894	Mvb12	0.677705	1.62285e-18	2.92962e-17
FBgn0262730	dtn	0.677659	8.39781e-09	6.2727e-08
FBgn0053928	CG33928	0.677627	0.57081	0.680183
FBgn0005660	Ets21C	0.677214	5.57223e-12	5.97299e-11
FBgn0014906	Hydr2	0.676491	2.18408e-33	7.45366e-32
FBgn0033855	link	0.676486	0.63234	0.733414
FBgn0267726	CG46059	0.675553	0.0636631	0.120395
FBgn0014037	Su(Tpl)	0.675372	6.14542e-13	7.21172e-12
FBgn0050486	CG30486	0.673496	0.688019	0.776181
FBgn0029944	Dok	0.672813	1.42009e-08	1.02582e-07
FBgn0001149	GstD1	0.671658	3.17397e-06	1.59574e-05
FBgn0015372	RabX1	0.67161	1.27122e-19	2.49035e-18
FBgn0034590	Magi	0.670447	7.70494e-20	1.52488e-18
FBgn0015558	tty	0.669252	0.0958066	0.168929
FBgn0263021	CG43316	0.669088	0.509206	0.623626
FBgn0029880	CG14443	0.668988	4.5703e-05	0.00018823
FBgn0260960	Baldspot	0.66895	1.41594e-17	2.34968e-16
FBgn0028494	CG6424	0.668924	1.06331e-21	2.34999e-20
FBgn0263197	Patronin	0.66881	4.90378e-26	1.31924e-24
FBgn0002868	MtnA	0.668076	0.000486532	0.00162874
FBgn0259984	kuz	0.666921	2.45354e-12	2.71435e-11
FBgn0030574	sbm	0.666466	9.87254e-08	6.31033e-07
FBgn0263256	CG43394	0.665886	0.0403912	0.0815253
FBgn0037013	CG13250	0.665566	0.522419	0.636739
FBgn0284231	CG46315	0.665488	2.08357e-21	4.48176e-20
FBgn0032089	Rcd-1r	0.664915	0.0427878	0.0855933
FBgn0023479	teq	0.664843	8.40917e-08	5.45805e-07
FBgn0053468	CG33468	0.663746	1.40434e-05	6.32017e-05
FBgn0000083	AnxB9	0.663707	1.39085e-21	3.03225e-20
FBgn0085430	CG34401	0.663243	6.16584e-19	1.14961e-17
FBgn0039184	CG6432	0.662907	0.567839	0.67773
FBgn0261547	Exn	0.661453	8.39345e-22	1.87648e-20
FBgn0259481	Mob2	0.661245	3.79118e-12	4.12333e-11
FBgn0034498	CG16868	0.661236	2.86293e-16	4.37504e-15
FBgn0054041	CG34041	0.661124	0.00714967	0.0179588
FBgn0003499	sr	0.660631	0.120384	0.20484
FBgn0005633	fln	0.659832	0.612938	0.716893
FBgn0063923	Kaz1-ORFB	0.658912	0.0193619	0.0431466
FBgn0053137	CG33137	0.658885	0.131525	0.219732
FBgn0039925	Kif3C	0.657282	0.45551	0.576
FBgn0052712	CG32712	0.656991	0.382909	0.505555
FBgn0032689	CG10413	0.656621	3.7527e-09	2.92759e-08
FBgn0038629	CG14304	0.656269	0.562738	0.673723
FBgn0004198	ct	0.655778	2.98052e-12	3.28231e-11
FBgn0029766	CG15784	0.655687	4.78538e-08	3.194e-07
FBgn0023458	Rbcn-3A	0.65433	8.53761e-11	8.13981e-10
FBgn0034328	BomBc1	0.654138	0.396206	0.518855
FBgn0000557	eEF1alpha2	0.653701	0.0193939	0.0431979
FBgn0037698	CG16779	0.653148	0.111817	0.192227
FBgn0261934	dikar	0.649714	5.30209e-12	5.69606e-11
FBgn0042185	MCU	0.64903	2.33203e-12	2.59479e-11
FBgn0265434	zip	0.647306	2.29874e-24	5.76654e-23
FBgn0053829	His2A:CG33829	0.647276	0.672232	0.764444
FBgn0264324	spg	0.645441	7.36647e-12	7.80103e-11
FBgn0020261	pcm	0.645226	3.60021e-12	3.92005e-11
FBgn0266405	CG45045	0.645145	0.453097	0.574129
FBgn0035112	CG13877	0.64484	0.189149	0.293603
FBgn0035802	Pura	0.644817	1.57118e-05	7.00252e-05
FBgn0036836	CG11619	0.644787	0.302423	0.421472
FBgn0283499	InR	0.644608	1.23348e-06	6.61832e-06
FBgn0034094	Tsf3	0.64401	4.14445e-16	6.25423e-15
FBgn0030266	CG11122	0.643775	6.37352e-06	3.03079e-05
FBgn0030954	CCKLR-17D3	0.6435	0.499427	0.615159
FBgn0045443	mthl11	0.643304	0.504603	0.619476
FBgn0260934	par-1	0.643277	7.91534e-12	8.30939e-11
FBgn0040397	CG3655	0.642896	7.41415e-06	3.48277e-05
FBgn0265417	CG44329	0.642145	0.364648	0.486904
FBgn0265598	Bx	0.642114	1.78713e-09	1.45655e-08
FBgn0053208	Mical	0.642038	2.54904e-23	6.15465e-22
FBgn0011672	Mvl	0.641923	4.67055e-12	5.05697e-11
FBgn0031971	Sirup	0.640121	0.0180045	0.0405806
FBgn0001255	ImpE3	0.639995	2.90258e-07	1.72724e-06
FBgn0031589	Naprt	0.639991	4.2625e-14	5.53323e-13
FBgn0014869	Pglym78	0.639707	4.25494e-06	2.09131e-05
FBgn0036935	CG14186	0.638854	0.646558	0.743741
FBgn0028741	fab1	0.638616	3.34313e-12	3.66492e-11
FBgn0250851	CG33981	0.638616	3.34313e-12	3.66492e-11
FBgn0016794	dos	0.637629	2.86374e-22	6.58524e-21
FBgn0052654	Sec16	0.637464	2.81533e-11	2.80314e-10
FBgn0039809	CG15547	0.637161	0.000201711	0.000729635
FBgn0261988	Gprk2	0.636904	1.09267e-10	1.02963e-09
FBgn0266101	CG44838	0.636646	2.59056e-08	1.78967e-07
FBgn0035134	CG1231	0.636291	0.550497	0.663178
FBgn0267390	dop	0.636238	7.0625e-21	1.4796e-19
FBgn0026160	tna	0.635983	1.48077e-14	2.0058e-13
FBgn0040696	CG18675	0.635619	0.23109	0.342153
FBgn0261086	Syt14	0.63556	0.145976	0.239768
FBgn0039593	Sid	0.635404	0.250607	0.363854
FBgn0038881	CG16791	0.634272	4.02013e-20	8.02198e-19
FBgn0004390	RasGAP1	0.633325	6.28539e-18	1.08015e-16
FBgn0029587	CG14797	0.633233	0.634398	0.735095
FBgn0260945	Atg1	0.633208	5.81883e-14	7.47317e-13
FBgn0030396	CG2556	0.632838	0.123629	0.209181
FBgn0029006	Smurf	0.632	5.22419e-12	5.62565e-11
FBgn0034880	ItgaPS5	0.631935	0.139079	0.230596
FBgn0038986	sit	0.630778	0.587156	0.69452
FBgn0037541	CG2747	0.630076	1.90945e-12	2.15942e-11
FBgn0261477	slim	0.628796	5.82429e-19	1.09014e-17
FBgn0284252	Letm1	0.628718	1.06587e-17	1.7903e-16
FBgn0005632	faf	0.628703	1.65104e-10	1.53917e-09
FBgn0038821	CG17267	0.628124	0.65416	0.749629
FBgn0033728	Cpr49Ae	0.628093	0.63709	0.736472
FBgn0031689	Cyp28d1	0.626813	0.0976417	0.171303
FBgn0260657	CG42540	0.626751	0.537423	0.651001
FBgn0022987	qkr54B	0.626352	1.35486e-21	2.96047e-20
FBgn0086676	spin	0.626297	2.84798e-28	8.28487e-27
FBgn0023076	Clk	0.624826	0.556177	0.667977
FBgn0035936	Tsp66E	0.624658	8.16993e-05	0.000320753
FBgn0027865	Tsp96F	0.624604	1.44644e-06	7.67146e-06
FBgn0261954	east	0.624248	2.0742e-14	2.77845e-13
FBgn0034128	CG4409	0.622748	0.412888	0.534827
FBgn0003963	ush	0.622737	2.29672e-09	1.85002e-08
FBgn0000114	bru1	0.621788	0.268139	0.383771
FBgn0085483	CG34454	0.621525	0.0995436	0.174008
FBgn0054056	CG34056	0.620673	0.0616803	0.117219
FBgn0086674	Tpst	0.620013	1.34077e-11	1.37029e-10
FBgn0037807	CG6293	0.619966	6.07272e-13	7.14377e-12
FBgn0023518	trr	0.619591	1.17973e-17	1.9781e-16
FBgn0038475	Keap1	0.619485	3.53222e-10	3.14706e-09
FBgn0085442	NKAIN	0.61944	1.49972e-18	2.72261e-17
FBgn0265140	Meltrin	0.619107	4.43281e-16	6.67895e-15
FBgn0010877	l(3)05822	0.618663	7.94405e-18	1.34839e-16
FBgn0034957	Rsph4a	0.617907	0.45011	0.570967
FBgn0033122	CG17002	0.617381	0.000186551	0.000679122
FBgn0000256	capu	0.615908	1.76352e-16	2.73388e-15
FBgn0010406	RNaseX25	0.614443	3.09065e-13	3.73585e-12
FBgn0004648	svr	0.613971	4.5501e-08	3.04961e-07
FBgn0030701	CG16952	0.613782	4.91808e-15	6.91394e-14
FBgn0030087	CG7766	0.612738	6.81158e-16	1.00899e-14
FBgn0265356	tn	0.610982	0.686906	0.775379
FBgn0032026	CG7627	0.610674	5.97791e-14	7.65711e-13
FBgn0002716	mei-W68	0.609628	8.57305e-05	0.000334945
FBgn0039585	CG1894	0.609611	0.153121	0.248837
FBgn0051202	alpha-Man-Ic	0.609073	0.448736	0.569649
FBgn0010042	GstD6	0.609007	0.546799	0.660028
FBgn0261811	pico	0.608645	4.5541e-10	3.98762e-09
FBgn0044826	Pak3	0.608352	1.0884e-11	1.12425e-10
FBgn0261625	GLS	0.607363	1.80914e-19	3.48062e-18
FBgn0034716	Oatp58Dc	0.607079	0.551782	0.663898
FBgn0015035	Cyp4e3	0.606217	0.436998	0.558271
FBgn0051231	CG31231	0.606176	0.353525	0.47547
FBgn0050394	CG30394	0.605999	1.43133e-10	1.33693e-09
FBgn0011230	poe	0.605969	4.02081e-09	3.11911e-08
FBgn0283741	prage	0.605396	4.03228e-10	3.56302e-09
FBgn0000094	Anp	0.605011	0.0637267	0.120492
FBgn0283442	vas	0.604471	0.221423	0.331089
FBgn0003733	tor	0.603788	0.536648	0.650307
FBgn0031099	CG17065	0.603666	0.0769425	0.141303
FBgn0032908	CG9270	0.603286	0.000428589	0.00145224
FBgn0052529	Hers	0.601601	9.11004e-17	1.44712e-15
FBgn0263395	hppy	0.600382	4.89561e-18	8.51925e-17
FBgn0004368	Ptp4E	0.599721	3.57651e-13	4.29626e-12
FBgn0259715	CG42369	0.599022	0.613276	0.716899
FBgn0032402	PLCXD	0.598795	0.000600098	0.00197
FBgn0043070	MESK2	0.59752	5.22464e-22	1.19008e-20
FBgn0033246	ACC	0.597008	6.9758e-18	1.19454e-16
FBgn0053988	Mid1	0.596507	0.383295	0.505982
FBgn0035087	CG2765	0.596359	1.55734e-20	3.17986e-19
FBgn0016984	sktl	0.596022	6.27229e-17	1.00461e-15
FBgn0038815	CG5466	0.595233	2.42018e-10	2.19888e-09
FBgn0051064	CG31064	0.594608	9.40398e-12	9.7765e-11
FBgn0027066	Eb1	0.594505	4.63157e-11	4.52292e-10
FBgn0262614	pyd	0.593594	5.42771e-10	4.68622e-09
FBgn0021796	Tor	0.592002	1.5808e-15	2.29239e-14
FBgn0004456	mew	0.591754	3.93446e-08	2.66286e-07
FBgn0012034	AcCoAS	0.59157	5.79463e-13	6.82494e-12
FBgn0010611	Hmgs	0.590807	7.12933e-21	1.49037e-19
FBgn0260793	2mit	0.589801	0.46262	0.58273
FBgn0052066	CG32066	0.589102	2.96046e-17	4.82976e-16
FBgn0031998	SLC5A11	0.587031	3.33789e-05	0.000141578
FBgn0030090	fend	0.586762	1.62205e-07	1.00101e-06
FBgn0263005	CG43313	0.586179	9.30727e-07	5.07564e-06
FBgn0259683	Ir40a	0.585203	5.7887e-08	3.82926e-07
FBgn0000449	dib	0.58485	0.67578	0.767574
FBgn0033875	CG6357	0.583547	1.05854e-07	6.71266e-07
FBgn0053494	CG33494	0.583485	1.51504e-08	1.08952e-07
FBgn0267350	PI4KIIIalpha	0.582967	2.88954e-09	2.29311e-08
FBgn0039466	CG5521	0.581634	1.39336e-08	1.00727e-07
FBgn0004055	uzip	0.581383	4.23884e-11	4.16044e-10
FBgn0263354	CG42784	0.581204	0.00516187	0.0134231
FBgn0039832	CG15563	0.58097	0.595308	0.701755
FBgn0014018	Rel	0.580914	3.18518e-07	1.87722e-06
FBgn0265629	CG44437	0.580464	0.222064	0.331681
FBgn0028903	CG13243	0.579961	0.489739	0.607488
FBgn0038647	CG14302	0.579777	0.688837	0.776923
FBgn0026787	Nhe1	0.579486	4.86973e-09	3.75354e-08
FBgn0085359	CG34330	0.579399	0.18924	0.293698
FBgn0003044	Pcl	0.579215	2.37889e-11	2.3784e-10
FBgn0004875	enc	0.578988	8.83637e-16	1.30293e-14
FBgn0028982	Spt6	0.578761	5.29307e-13	6.24944e-12
FBgn0263391	hts	0.577821	9.14892e-12	9.52158e-11
FBgn0003279	RpL4	0.577636	0.024067	0.0521515
FBgn0053855	His1:CG33855	0.576347	0.417283	0.538857
FBgn0029131	Debcl	0.574803	6.44676e-09	4.87571e-08
FBgn0004896	fd59A	0.574677	0.367199	0.489689
FBgn0286940	CG46434	0.574009	0.236164	0.347849
FBgn0036882	CG9279	0.574009	0.236164	0.347849
FBgn0003277	RpII215	0.573876	1.30068e-09	1.07184e-08
FBgn0261975	CG42806	0.573829	3.50055e-21	7.44675e-20
FBgn0040206	krz	0.573573	2.4083e-10	2.19221e-09
FBgn0020493	Dad	0.572328	4.08186e-05	0.000169779
FBgn0031554	CG15418	0.571838	0.732749	0.810935
FBgn0036764	CG5535	0.571151	7.59429e-10	6.45648e-09
FBgn0021760	chb	0.570959	4.30049e-09	3.32806e-08
FBgn0040071	tara	0.570836	1.99985e-08	1.40674e-07
FBgn0033636	tou	0.569973	7.98668e-11	7.62961e-10
FBgn0052264	CG32264	0.569864	6.07421e-12	6.46087e-11
FBgn0034602	Lapsyn	0.569745	0.380601	0.503402
FBgn0003710	tipE	0.568762	0.0582218	0.111436
FBgn0053902	His2B:CG33902	0.568257	0.707571	0.791214
FBgn0030089	AP-1gamma	0.568175	9.55815e-18	1.61104e-16
FBgn0010825	Gug	0.56808	1.78878e-12	2.0277e-11
FBgn0033760	CG8785	0.568016	0.638604	0.737232
FBgn0017581	Lk6	0.567859	9.88661e-12	1.02232e-10
FBgn0042135	Gdap2	0.567822	2.34473e-15	3.35488e-14
FBgn0036235	CG6938	0.567739	0.729193	0.807817
FBgn0031045	CG14212	0.567657	0.583154	0.69097
FBgn0052085	CG32085	0.567601	0.000797222	0.00254028
FBgn0265297	pAbp	0.566999	8.19032e-12	8.57158e-11
FBgn0053196	dpy	0.566602	4.83624e-05	0.000198169
FBgn0263601	mib1	0.566253	5.62206e-11	5.43522e-10
FBgn0283712	LIMK1	0.566225	1.49193e-12	1.70521e-11
FBgn0039633	CG11873	0.564931	1.1353e-09	9.45236e-09
FBgn0031006	rictor	0.564352	4.7967e-11	4.67945e-10
FBgn0010352	Nc73EF	0.564188	1.29722e-19	2.53102e-18
FBgn0033226	puml	0.563955	2.46457e-09	1.97043e-08
FBgn0261549	rdgA	0.563648	5.90868e-07	3.33135e-06
FBgn0030631	CG6227	0.563015	6.96314e-06	3.2869e-05
FBgn0284223	CG46307	0.562745	5.29889e-06	2.55884e-05
FBgn0038916	dnd	0.562725	0.209821	0.318224
FBgn0000927	fs(1)Ya	0.562455	0.270855	0.38657
FBgn0031322	CG5001	0.562007	0.00879463	0.0216644
FBgn0013348	TpnC41C	0.56127	0.530594	0.643859
FBgn0037548	CG7900	0.561003	0.160259	0.258527
FBgn0085386	CG34357	0.560819	0.0527911	0.102462
FBgn0053113	Rtnl1	0.56045	4.13469e-25	1.06487e-23
FBgn0053300	Muc30E	0.56035	0.0537308	0.103994
FBgn0028896	CG17329	0.560074	0.625379	0.727923
FBgn0003435	sm	0.559611	1.32717e-07	8.32008e-07
FBgn0284254	Impbeta11	0.559514	5.55883e-07	3.15251e-06
FBgn0034628	Acox57D-p	0.559113	2.36275e-14	3.13884e-13
FBgn0028424	JhI-26	0.558868	4.8894e-07	2.80248e-06
FBgn0035498	Fit1	0.558494	1.67512e-17	2.76553e-16
FBgn0266437	CG45067	0.558421	0.323036	0.443354
FBgn0052103	SCaMC	0.556638	3.13889e-07	1.85529e-06
FBgn0265487	mbl	0.556435	1.09279e-05	5.01623e-05
FBgn0003189	r	0.556389	3.48676e-09	2.72673e-08
FBgn0036101	NijA	0.556201	4.54752e-08	3.04961e-07
FBgn0036872	CG12519	0.556084	0.0909499	0.161946
FBgn0029088	disp	0.555613	6.61004e-07	3.69016e-06
FBgn0030222	CG9806	0.554932	0.70115	0.785946
FBgn0025802	Sbf	0.554693	3.28114e-06	1.64278e-05
FBgn0034420	CG10737	0.55442	5.44617e-10	4.69635e-09
FBgn0034082	CG10734	0.552893	0.738489	0.815384
FBgn0036741	anchor	0.552596	3.33683e-06	1.66634e-05
FBgn0039756	CG9743	0.551795	1.95189e-08	1.37601e-07
FBgn0037726	CG9492	0.551565	0.326396	0.446569
FBgn0286831	sov	0.551015	3.79967e-09	2.95469e-08
FBgn0030809	Ubr1	0.550854	4.72385e-13	5.59791e-12
FBgn0043043	Desat2	0.550511	0.386002	0.508457
FBgn0039051	CG17109	0.550461	0.57224	0.681635
FBgn0062565	Or19b	0.550102	0.304228	0.423194
FBgn0039264	CG11786	0.549965	0.463436	0.583326
FBgn0024963	GluClalpha	0.549713	0.63905	0.737565
FBgn0052280	CG32280	0.54963	3.87004e-08	2.62294e-07
FBgn0086365	Orct2	0.549338	1.10948e-13	1.39522e-12
FBgn0038172	Adgf-D	0.548907	0.553379	0.665489
FBgn0051151	wge	0.548748	3.67414e-25	9.53374e-24
FBgn0004397	Vinc	0.547045	1.16285e-09	9.66503e-09
FBgn0036574	elg1	0.547028	1.23257e-08	8.98429e-08
FBgn0027655	htt	0.546575	2.03643e-12	2.29229e-11
FBgn0263968	nonC	0.546311	4.19943e-10	3.70056e-09
FBgn0028645	beat-Ib	0.546293	0.750574	0.825256
FBgn0259143	CG42258	0.546246	5.52175e-11	5.35362e-10
FBgn0039078	CG4374	0.545613	0.362152	0.484906
FBgn0039464	CG6330	0.545274	7.87313e-10	6.67006e-09
FBgn0039282	Bili	0.5448	0.338735	0.459803
FBgn0036448	mop	0.544752	1.40861e-07	8.7827e-07
FBgn0053293	CG33293	0.54451	0.288789	0.406341
FBgn0266411	sima	0.544346	2.49122e-08	1.72475e-07
FBgn0003391	shg	0.543618	8.33156e-07	4.58236e-06
FBgn0040038	klhl10	0.543566	0.481152	0.599723
FBgn0030486	Set2	0.543232	3.45747e-11	3.42836e-10
FBgn0031759	lid	0.54321	2.44953e-10	2.22346e-09
FBgn0039863	CG1815	0.542359	2.2535e-07	1.36797e-06
FBgn0034184	CG9646	0.542298	1.3433e-13	1.67835e-12
FBgn0030286	Gapvd1	0.541444	2.47247e-13	3.01886e-12
FBgn0027558	Pgant3	0.541293	2.57149e-18	4.54861e-17
FBgn0040338	TfIIA-S-2	0.540692	3.16602e-06	1.59258e-05
FBgn0041171	ago	0.540661	1.56447e-14	2.11324e-13
FBgn0029685	CG2938	0.540186	6.15112e-09	4.67407e-08
FBgn0283427	FASN1	0.540129	5.52551e-11	5.35362e-10
FBgn0261461	RhoGAP18B	0.53988	1.01076e-16	1.60032e-15
FBgn0031107	HERC2	0.539518	0.000492772	0.00164678
FBgn0012051	CalpA	0.538665	1.48602e-05	6.65369e-05
FBgn0035513	Cpr64Ad	0.538328	0.525152	0.638861
FBgn0050115	GEFmeso	0.536999	3.13924e-12	3.45317e-11
FBgn0035106	rno	0.53672	1.45859e-07	9.07089e-07
FBgn0267002	unc-104	0.536642	6.54193e-06	3.10477e-05
FBgn0037757	CG8516	0.536604	5.63266e-12	6.03107e-11
FBgn0026577	CG8677	0.53598	1.60781e-08	1.1528e-07
FBgn0035189	CG9119	0.534218	0.640709	0.738862
FBgn0038814	CG15923	0.53366	0.431252	0.552611
FBgn0030018	slpr	0.532412	6.2607e-07	3.51955e-06
FBgn0267795	Frl	0.532335	1.45862e-08	1.05129e-07
FBgn0053087	LRP1	0.531359	9.72458e-07	5.2764e-06
FBgn0034494	CG10444	0.531102	5.43911e-09	4.14936e-08
FBgn0037290	CG1124	0.530167	0.587832	0.695149
FBgn0000581	E(Pc)	0.529896	2.40033e-12	2.66465e-11
FBgn0262534	CG43088	0.52913	4.37009e-05	0.0001806
FBgn0031016	kek5	0.529025	3.79674e-05	0.000158671
FBgn0041180	Tep4	0.528921	6.29189e-09	4.76979e-08
FBgn0040551	CG11686	0.528804	0.00946512	0.0230518
FBgn0034304	CG5742	0.527862	1.85915e-09	1.51142e-08
FBgn0039665	CG2310	0.527631	0.000666921	0.00216072
FBgn0051664	CG31664	0.527495	0.724785	0.804594
FBgn0262519	Mi-2	0.52652	1.91172e-12	2.15946e-11
FBgn0003076	Pgm1	0.52641	9.05704e-08	5.83541e-07
FBgn0039808	CG12071	0.525949	0.226319	0.336551
FBgn0040850	CG15210	0.525546	0.659584	0.753788
FBgn0014417	CG13397	0.525455	2.12573e-08	1.49094e-07
FBgn0061362	CG33785	0.524998	0.000786671	0.00251495
FBgn0061361	CG33786	0.524998	0.000786671	0.00251495
FBgn0046763	CG17278	0.523988	3.57747e-11	3.53646e-10
FBgn0000414	Dab	0.52388	4.34194e-11	4.25298e-10
FBgn0033942	Cpr51A	0.523743	0.330528	0.451009
FBgn0284257	Ttd14	0.522313	1.87067e-09	1.5195e-08
FBgn0000092	dyw	0.521203	0.575681	0.684805
FBgn0038466	CG8907	0.521191	0.399259	0.522146
FBgn0037513	pyd3	0.52043	1.57098e-05	7.00252e-05
FBgn0000709	fliI	0.520271	1.32475e-12	1.52496e-11
FBgn0030524	CG10993	0.520263	0.321479	0.441907
FBgn0032821	CdGAPr	0.519653	1.38348e-11	1.41095e-10
FBgn0038250	CG3505	0.519374	0.0400895	0.0810178
FBgn0036374	Spt20	0.519019	2.18179e-08	1.52694e-07
FBgn0037727	Nepl12	0.518955	0.698285	0.784008
FBgn0027079	ValRS	0.518948	1.96516e-10	1.81275e-09
FBgn0035410	CG14964	0.518883	0.00173473	0.00510483
FBgn0002932	neur	0.517855	1.01864e-10	9.61688e-10
FBgn0052447	CG32447	0.516894	2.28992e-06	1.18141e-05
FBgn0052484	Sk2	0.516503	3.9223e-05	0.000163635
FBgn0037625	CG11768	0.516269	0.321013	0.441392
FBgn0083971	CG34135	0.516269	0.321013	0.441392
FBgn0036970	Spn77Bc	0.516185	0.213628	0.322378
FBgn0032752	CG10702	0.51612	0.580677	0.689085
FBgn0040395	Unc-76	0.515039	1.06675e-18	1.95808e-17
FBgn0039075	CG4393	0.514534	0.0144809	0.0334266
FBgn0026369	Sara	0.514472	2.34801e-09	1.88819e-08
FBgn0020618	Rack1	0.514409	0.0646562	0.12201
FBgn0040726	dpr1	0.51417	0.689644	0.777288
FBgn0064912	CG31178	0.514029	0.631617	0.732876
FBgn0026441	ear	0.51367	3.33962e-13	4.02171e-12
FBgn0031347	CG10869	0.513596	0.679873	0.770545
FBgn0003459	stwl	0.512197	9.12596e-05	0.000354539
FBgn0002936	ninaA	0.511801	0.66993	0.762634
FBgn0262890	CG43245	0.511001	0.00260553	0.00731518
FBgn0019990	Gcn2	0.510854	4.06286e-10	3.58675e-09
FBgn0029095	aru	0.510808	2.04455e-05	8.96742e-05
FBgn0029750	CG3323	0.510662	0.00327329	0.00897853
FBgn0003175	px	0.510486	6.66474e-13	7.79274e-12
FBgn0031866	Nlg2	0.510262	0.772902	0.840145
FBgn0265082	Cdep	0.510235	6.7222e-10	5.74032e-09
FBgn0266019	rudhira	0.509678	2.09929e-08	1.47347e-07
FBgn0283521	lola	0.509621	4.13e-10	3.6427e-09
FBgn0052847	CG32847	0.508686	0.731875	0.810174
FBgn0035676	ssp6	0.507759	0.171574	0.272632
FBgn0284224	CG46308	0.507518	0.0189465	0.0424024
FBgn0035229	pns	0.507078	4.18457e-14	5.43938e-13
FBgn0034975	enok	0.506923	1.6747e-05	7.44327e-05
FBgn0033692	wash	0.506731	0.000373302	0.00128625
FBgn0028646	aralar1	0.506238	1.74169e-13	2.14831e-12
FBgn0027106	Inx7	0.506113	0.473311	0.592999
FBgn0033979	Cyp6a19	0.506043	0.484443	0.602543
FBgn0037934	CG6830	0.505418	0.385857	0.508457
FBgn0262872	milt	0.504423	1.6666e-15	2.41319e-14
FBgn0051849	CG31849	0.504197	8.55042e-05	0.000334197
FBgn0035344	Cyp4d20	0.504078	4.38938e-09	3.39413e-08
FBgn0011224	heph	0.503983	3.49184e-06	1.74016e-05
FBgn0036053	iPLA2-VIA	0.503751	7.36207e-13	8.5873e-12
FBgn0034570	CG10543	0.503205	1.72244e-13	2.12728e-12
FBgn0010247	Parp	0.503126	0.000727135	0.00234089
FBgn0087008	e(y)3	0.502427	3.56486e-11	3.5276e-10
FBgn0001235	hth	0.502412	0.7578	0.830082
FBgn0033194	Vps13	0.501301	2.08053e-06	1.08031e-05
FBgn0032345	CG14921	0.500998	0.0104926	0.0252208
FBgn0039302	Nup358	0.500056	1.31647e-08	9.56693e-08
FBgn0016059	Sema1b	0.499455	3.59123e-06	1.786e-05
FBgn0034271	Vps50	0.499154	1.33063e-05	6.01369e-05
FBgn0038803	CG5191	0.498058	1.42486e-06	7.56532e-06
FBgn0039296	Sil1	0.497984	1.79809e-12	2.03587e-11
FBgn0032965	CG11629	0.497904	0.000660937	0.0021435
FBgn0265630	sno	0.497367	1.26825e-08	9.22344e-08
FBgn0004607	zfh2	0.496883	0.182122	0.285263
FBgn0030200	RabX2	0.496724	0.626838	0.728617
FBgn0259234	Camta	0.495809	5.75549e-07	3.25068e-06
FBgn0261858	Mzt1	0.495797	0.448123	0.569096
FBgn0029754	CG15930	0.495744	0.494242	0.610877
FBgn0261611	CG42700	0.495643	0.602413	0.708066
FBgn0063492	GstE8	0.495513	2.2059e-07	1.34076e-06
FBgn0005624	Psc	0.495454	3.22108e-09	2.5292e-08
FBgn0042180	CG18870	0.495303	5.97168e-07	3.36098e-06
FBgn0085478	Zdhhc8	0.495267	4.40472e-11	4.31011e-10
FBgn0265988	mv	0.495253	1.47699e-09	1.21196e-08
FBgn0260997	CG42598	0.493119	0.549839	0.662798
FBgn0032957	CG2225	0.493037	3.49344e-05	0.000147078
FBgn0034447	CG7744	0.493027	1.8616e-06	9.71854e-06
FBgn0032803	CG13082	0.492732	0.585214	0.692769
FBgn0038108	CG7518	0.492098	3.04209e-10	2.74328e-09
FBgn0041111	lilli	0.491365	5.4577e-10	4.7021e-09
FBgn0026375	RhoGAPp190	0.491251	2.954e-07	1.7546e-06
FBgn0027836	Dgp-1	0.490844	9.40192e-08	6.04552e-07
FBgn0035431	CG14968	0.490798	0.4445	0.565312
FBgn0030747	CG4301	0.490105	0.150775	0.245978
FBgn0011754	PhKgamma	0.490035	1.81626e-09	1.4778e-08
FBgn0267487	Ptp61F	0.490004	1.90786e-15	2.75017e-14
FBgn0051522	CG31522	0.489648	9.60425e-08	6.15513e-07
FBgn0265523	Smr	0.48951	6.46671e-10	5.52703e-09
FBgn0061200	Nup153	0.488342	8.62275e-09	6.43574e-08
FBgn0053814	His2A:CG33814	0.488131	0.312033	0.431378
[truncated: 7,660 more rows]
